# Supplementary material for: Next-generation systematics: An innovative approach to resolve the structure of complex prokaryotic taxa
Source: PubMed Central journal article supplement (PMC5141411; doi:10.1038/srep38392), 2016-12-07
Supplement: srep38392-s1.pdf [file srep38392-s1.pdf]

**Next-generation systematics: An innovative approach to resolve the structure of  
complex prokaryotic taxa**

Vartul Sangal<sup>1\*</sup>, Michael Goodfellow<sup>2</sup>, Amanda L. Jones<sup>1</sup>, Edward C. Schwalbe<sup>1</sup>, Jochen Blom<sup>3</sup>, Paul A. Hoskisson<sup>4</sup>, Iain C. Sutcliffe<sup>1</sup>

\*Corresponding author

Vartul Sangal

Faculty of Health and Life Sciences

Northumbria University

Newcastle upon Tyne NE1 8ST, UK

Email: [vartul.sangal@northumbria.ac.uk](mailto:vartul.sangal@northumbria.ac.uk)

Authors' affiliations:

<sup>1</sup>Faculty of Health and Life Sciences, Northumbria University, Newcastle upon Tyne NE1 8ST, UK

<sup>2</sup>School of Biology, University of Newcastle, Newcastle upon Tyne NE1 7RU, UK

<sup>3</sup>Heinrich-Buff-Ring 58, Justus-Liebig-Universität, 35392 Gießen, Germany

<sup>4</sup>Strathclyde Institute of Pharmacy and Biomedical Sciences, University of Strathclyde, 161 Cathedral Street, Glasgow G4 0RE, UK









Supplementary Table 1. Details of strains and genomic features

| S. no. | S-ID   | Organism                   | Strain                 | Accession No.  | size (Mb) | GC % | #Genes | RNA genes  | Group | Species | Fraction |
|--------|--------|----------------------------|------------------------|----------------|-----------|------|--------|------------|-------|---------|----------|
| 1      | re10   | Rhodococcus equi           | 103S                   | NC_014659      | 5.04      | 68.8 | 4740   | 64 A       | A-1   | A-1     | 0.73     |
| 2      | re11   | Rhodococcus equi           | N1288                  | LRQY000000000  | 5.17      | 68.8 | 4942   | 56 A       | A-1   | A-1     | 0.70     |
| 3      | re12   | Rhodococcus equi           | N1295                  | LRQZ000000000  | 5.31      | 68.7 | 5078   | 55 A       | A-1   | A-1     | 0.68     |
| 4      | re13   | Rhodococcus equi           | N1301                  | LRRA000000000  | 5.65      | 68.5 | 5433   | 53 A       | A-1   | A-1     | 0.64     |
| 5      | re14   | Rhodococcus equi           | ATCC 33707             | NZ_CM001149    | 5.26      | 68.8 | 4986   | 68 A       | A-1   | A-1     | 0.69     |
| 6      | re9    | Rhodococcus equi           | C7 <sup>T</sup>        | APJC000000000  | 5.2       | 68.8 | 4978   | 55 A       | A-1   | A-1     | 0.69     |
| 7      | ch56   | Rhodococcus hoagii         | DSM 20295 <sup>T</sup> | LRRF000000000  | 4.97      | 68.8 | 4705   | 54 A       | A-1   | A-1     | 0.73     |
| 8      | rd55   | Rhodococcus defluvii       | Ca11 <sup>T</sup>      | JPOC000000000  | 5.14      | 68.7 | 4740   | 56 A       | A-2   | A-2     | 0.73     |
| 9      | r34    | Rhodococcus sp.            | BCP1                   | AVAE000000000  | 6.21      | 70.4 | 5889   | 58 B (B1)  | B1-1  | B1-1    | 0.34     |
| 10     | r38    | Rhodococcus sp.            | EsD8                   | CAVJ000000000  | 6.63      | 70.1 | 6201   | 51 B (B1)  | B1-1  | B1-1    | 0.32     |
| 11     | ra97   | Rhodococcus aetherivorans  | lcdP1                  | NZ_CP011341.1  | 5.92      | 70.6 | 5589   | 66 B (B1)  | B1-1  | B1-1    | 0.36     |
| 12     | rrh31  | Rhodococcus rhodochrous    | ATCC 21198             | AZHI000000000  | 6.48      | 70.2 | 6086   | 55 B (B1)  | B1-1  | B1-1    | 0.33     |
| 13     | r42    | Rhodococcus sp.            | P14                    | AJFC000000000  | 5.68      | 70.4 | 5253   | 51 B (B1)  | B1-2  | B1-2    | 0.38     |
| 14     | rrb102 | Rhodococcus ruber          | DSM 43338 <sup>T</sup> | LRRL000000000  | 5.3       | 70.7 | 4934   | 59 B (B1)  | B1-2  | B1-2    | 0.41     |
| 15     | rrb103 | Rhodococcus ruber          | IEGM 231               | CCSD010000000  | 5.99      | 70.2 | 5636   | 55 B (B1)  | B1-2  | B1-2    | 0.35     |
| 16     | rrb104 | Rhodococcus ruber          | P25                    | LDUF010000000  | 5.73      | 70.5 | 5362   | 58 B (B1)  | B1-2  | B1-2    | 0.37     |
| 17     | rrb32  | Rhodococcus ruber          | Chol-4                 | ANGC000000000  | 5.4       | 70.6 | 5029   | 67 B (B1)  | B1-2  | B1-2    | 0.40     |
| 18     | rrb33  | Rhodococcus ruber          | BKS 20-38              | AOEX000000000  | 6.13      | 69.7 | 5758   | 56 B (B1)  | B1-3  | B1-3    | 0.35     |
| 19     | rph87  | Rhodococcus phenolicus     | DSM 44812 <sup>T</sup> | LRRH000000000  | 6.28      | 68.4 | 6000   | 58 B       | B-4   | B-4     | 0.33     |
| 20     | r41    | Rhodococcus sp.            | R1101                  | AJVB000000000  | 4.66      | 67.9 | 4384   | 58 B (B2)  | B2-5  | B2-5    | 0.46     |
| 21     | rg82   | Rhodococcus gordoniae      | DSM 44689 <sup>T</sup> | LPZN000000000  | 4.82      | 67.9 | 4519   | 59 B (B2)  | B2-5  | B2-5    | 0.44     |
| 22     | rrh101 | Rhodococcus rhodochrous    | DSM 43241 <sup>T</sup> | LRRK000000000  | 5.18      | 68.2 | 4843   | 59 B (B2)  | B2-6  | B2-6    | 0.41     |
| 23     | rrh29  | Rhodococcus rhodochrous    | BKS6-46                | AGVW000000000  | 6.22      | 67.4 | 5612   | 59 B (B2)  | B2-6  | B2-6    | 0.36     |
| 24     | r111   | Rhodococcus sp.            | Chr-9                  | JTIZ010000000  | 5.35      | 67.7 | 5169   | 56 B (B2)  | B2-7  | B2-7    | 0.39     |
| 25     | r37    | Rhodococcus sp.            | R4                     | AFAQ000000000  | 8.86      | 69.5 | 8252   | 109 B (B2) | B2-7  | B2-7    | 0.24     |
| 26     | r93    | Rhodococcus sp.            | P52                    | JPJJ010000000  | 5.29      | 67.9 | 5061   | 57 B (B2)  | B2-7  | B2-7    | 0.40     |
| 27     | rp25   | Rhodococcus pyridinivorans | SB3094                 | NC_023150      | 5.23      | 68.0 | 4956   | 47 B (B2)  | B2-7  | B2-7    | 0.40     |
| 28     | rp26   | Rhodococcus pyridinivorans | AK37                   | AHBW000000000  | 5.25      | 67.9 | 5139   | 55 B (B2)  | B2-7  | B2-7    | 0.39     |
| 29     | rp88   | Rhodococcus pyridinivorans | DSM 44555 <sup>T</sup> | LRRIO000000000 | 5.18      | 67.9 | 4931   | 56 B (B2)  | B2-7  | B2-7    | 0.41     |

|    |       |                                |                              |               |       |      |      |      |     |      |
|----|-------|--------------------------------|------------------------------|---------------|-------|------|------|------|-----|------|
| 30 | r43   | Rhodococcus sp.                | JVH1                         | AKKP00000000  | 9.18  | 67.0 | 8872 | 55 C | C-1 | 0.46 |
| 31 | r44   | Rhodococcus sp.                | DK17                         | AJLQ00000000  | 9.11  | 67.1 | 8909 | 56 C | C-1 | 0.45 |
| 32 | rj52  | Rhodococcus jostii             | RHA1                         | NC_008268     | 7.8   | 67.5 | 7474 | 62 C | C-1 | 0.54 |
| 33 | ri20  | Rhodococcus imtechensis        | RKJ300 <sup>T</sup>          | AJJH00000000  | 8.23  | 67.2 | 8331 | 54 C | C-2 | 0.48 |
| 34 | ro24  | Rhodococcus opacus             | M213                         | AJYC00000000  | 9.2   | 67.0 | 8934 | 57 C | C-2 | 0.45 |
| 35 | ro86  | <b>Rhodococcus opacus</b>      | <b>DSM 43205<sup>T</sup></b> | LRRG00000000  | 8.53  | 67.3 | 8267 | 53 C | C-2 | 0.49 |
| 36 | rw47  | Rhodococcus wratislaviensis    | IFP 2016                     | ANIU00000000  | 9.7   | 66.9 | 9763 | 64 C | C-2 | 0.41 |
| 39 | ro23  | Rhodococcus opacus             | PD630                        | AGVD00000000  | 9.16  | 67.0 | 8540 | 58 C | C-2 | 0.47 |
| 37 | ro85  | Rhodococcus opacus             | R7                           | CPO08947.1    | 8.47  | 67.2 | 7859 | 60 C | C-3 | 0.51 |
| 38 | rw96  | Rhodococcus wratislaviensis    | NBRC 100605 <sup>T</sup>     | BAWF01000000  | 10.41 | 66.8 | 9785 | 57 C | C-3 | 0.41 |
| 40 | ro22  | Rhodococcus opacus             | B4                           | NC_012522     | 7.91  | 67.9 | 7397 | 61 C | C-4 | 0.55 |
| 41 | r105  | Rhodococcus sp.                | 311R                         | CFHW01000000  | 6.35  | 62.6 | 6088 | 57 D | D-1 | 0.59 |
| 42 | rey16 | Rhodococcus erythropolis       | SK121                        | ACNO00000000  | 6.79  | 62.5 | 6573 | 56 D | D-1 | 0.54 |
| 43 | rey57 | Rhodococcus erythropolis       | JCM 6824                     | BBLL01000000  | 7.02  | 62.3 | 6816 | 54 D | D-1 | 0.52 |
| 44 | rey58 | Rhodococcus erythropolis       | NRRL B-16532                 | JOILO1000000  | 6.94  | 62.4 | 6746 | 61 D | D-1 | 0.53 |
| 45 | r60   | <b>Rhodococcus sp.</b>         | <b>AJR001</b>                | LPZM00000000  | 7.26  | 62.4 | 7124 | 56 D | D-1 | 0.50 |
| 46 | rey98 | Rhodococcus erythropolis       | CAS922i                      | LDPN01000000  | 7.21  | 62.3 | 7001 | 66 D | D-1 | 0.51 |
| 47 | rq27  | Rhodococcus qingshengii        | BKS 20-40                    | AODN00000000  | 6.6   | 62.4 | 6431 | 55 D | D-1 | 0.55 |
| 48 | rq89  | Rhodococcus qingshengii        | TUHH-12                      | JNCU01000000  | 7.43  | 61.7 | 8298 | 65 D | D-1 | 0.43 |
| 49 | rq90  | <b>Rhodococcus qingshengii</b> | <b>JCM 15477<sup>T</sup></b> | LRRJ00000000  | 7.26  | 62.4 | 7130 | 56 D | D-1 | 0.50 |
| 50 | r107  | Rhodococcus sp.                | ARP2                         | LEKE01000000  | 6.3   | 62.4 | 6051 | 63 D | D-2 | 0.59 |
| 51 | r40   | Rhodococcus sp.                | P27                          | AVCO00000000  | 6.26  | 62.4 | 6736 | 60 D | D-2 | 0.53 |
| 52 | rey15 | Rhodococcus erythropolis       | PR4                          | NC_012490     | 6.52  | 62.3 | 6250 | 69 D | D-2 | 0.57 |
| 53 | rey17 | Rhodococcus erythropolis       | CCM2595                      | NC_022115     | 6.28  | 62.5 | 5935 | 65 D | D-2 | 0.60 |
| 54 | rey18 | Rhodococcus erythropolis       | XP                           | AGCF00000000  | 7.23  | 62.3 | 7123 | 67 D | D-2 | 0.50 |
| 55 | rey19 | Rhodococcus erythropolis       | DN1                          | AUZK00000000  | 6.55  | 62.4 | 6545 | 56 D | D-2 | 0.54 |
| 56 | rey59 | Rhodococcus erythropolis       | R138                         | ASKF01000000  | 6.77  | 62.3 | 6486 | 65 D | D-2 | 0.55 |
| 57 | rey99 | Rhodococcus erythropolis       | BG43                         | NZ_CP011295.1 | 6.33  | 62.4 | 6011 | 72 D | D-2 | 0.59 |
| 58 | ro84  | Rhodococcus opacus             | NRRL B-24011                 | JOIM01000000  | 6.38  | 62.4 | 6040 | 60 D | D-2 | 0.59 |
| 59 | rrh30 | Rhodococcus rhodochrous        | ATCC 17895                   | ASJJ00000000  | 6.87  | 62.3 | 6617 | 53 D | D-2 | 0.54 |
| 60 | r108  | Rhodococcus sp.                | AD45                         | JYOP01000000  | 6.79  | 61.7 | 6544 | 54 D | D-3 | 0.54 |
| 61 | r113  | Rhodococcus sp.                | 4J2A2                        | CEDU01000000  | 6.45  | 61.8 | 6211 | 55 D | D-3 | 0.57 |

|    |       |                                      |                              |               |      |      |      |           |      |      |
|----|-------|--------------------------------------|------------------------------|---------------|------|------|------|-----------|------|------|
| 62 | rrh92 | Rhodococcus rhodochrous              | NRRL B-1306                  | JNWS01000000  | 6.78 | 61.7 | 6586 | 59 D      | D-3  | 0.54 |
| 63 | rf61  | Rhodococcus fascians                 | A22b                         | JOKB01000000  | 5.91 | 64.3 | 5678 | 58 E (E1) | E1-1 | 0.45 |
| 64 | r35   | Rhodococcus sp.                      | 114MFTsu3.1                  | ARTN00000000  | 5.55 | 64.7 | 5307 | 56 E (E1) | E1-2 | 0.48 |
| 65 | r36   | Rhodococcus sp.                      | 29MFTsu3.1                   | ARND00000000  | 5.58 | 64.6 | 5352 | 56 E (E1) | E1-2 | 0.47 |
| 66 | rf64  | Rhodococcus fascians                 | A44a                         | JMEX01000000  | 5.95 | 64.5 | 5683 | 49 E (E1) | E1-2 | 0.45 |
| 67 | rf65  | Rhodococcus fascians                 | A73a                         | JMEW01000000  | 5.93 | 64.4 | 5639 | 55 E (E1) | E1-2 | 0.45 |
| 68 | rf69  | Rhodococcus fascians                 | 02-815                       | JMFF01000000  | 6.24 | 64.3 | 5969 | 53 E (E1) | E1-2 | 0.42 |
| 69 | rf70  | Rhodococcus fascians                 | 02-816c                      | JMFE01000000  | 6.08 | 64.5 | 5956 | 55 E (E1) | E1-2 | 0.43 |
| 70 | rf75  | Rhodococcus fascians                 | A76                          | JMEV01000000  | 6.03 | 64.6 | 5889 | 53 E (E2) | E2-3 | 0.43 |
| 71 | r110  | Rhodococcus sp.                      | BS-15                        | BAOX01000000  | 5.51 | 64.4 | 6162 | 43 E (E2) | E2-4 | 0.41 |
| 72 | r114  | Rhodococcus sp.                      | B7740                        | NZ_CP010797.1 | 5.34 | 64.9 | 5149 | 59 E (E2) | E2-5 | 0.49 |
| 73 | rf72  | Rhodococcus fascians                 | 05-339-1                     | JMFC01000000  | 5.73 | 64.7 | 5561 | 51 E (E2) | E2-5 | 0.46 |
| 74 | rf63  | Rhodococcus fascians                 | 04-516                       | JMFD01000000  | 5.82 | 64.2 | 5588 | 53 E (E2) | E2-6 | 0.45 |
| 75 | rf73  | Rhodococcus fascians                 | A21d2                        | JMFA01000000  | 5.98 | 64.1 | 5748 | 57 E (E2) | E2-6 | 0.44 |
| 76 | rf74  | Rhodococcus fascians                 | A25f                         | JMEZ01000000  | 5.87 | 64.1 | 5660 | 55 E (E2) | E2-6 | 0.45 |
| 77 | rf81  | Rhodococcus fascians                 | LMG 3625                     | JMEM01000000  | 5.94 | 64.1 | 5886 | 58 E (E2) | E2-6 | 0.43 |
| 78 | r112  | Rhodococcus sp.                      | PML 026                      | JZIS01000000  | 5.17 | 64.7 | 4965 | 60 E (E2) | E2-7 | 0.51 |
| 79 | r39   | Rhodococcus sp.                      | JG-3                         | AXVF00000000  | 5.27 | 64.6 | 5100 | 54 E (E2) | E2-7 | 0.50 |
| 80 | rf100 | Rhodococcus fascians                 | F7                           | LFDS01000000  | 5.25 | 64.7 | 5047 | 50 E (E2) | E2-7 | 0.50 |
| 81 | rf62  | Rhodococcus fascians                 | A3b                          | JMEY01000000  | 6.03 | 64.2 | 5846 | 55 E (E2) | E2-7 | 0.43 |
| 82 | rf66  | Rhodococcus fascians                 | A78                          | JMEU01000000  | 6    | 64.3 | 5783 | 53 E (E2) | E2-7 | 0.44 |
| 83 | rf67  | Rhodococcus fascians                 | GIC26                        | JMES01000000  | 5.34 | 64.5 | 5176 | 50 E (E2) | E2-7 | 0.49 |
| 84 | rf68  | Rhodococcus fascians                 | GIC36                        | JMER01000000  | 5.56 | 64.5 | 5392 | 52 E (E2) | E2-7 | 0.47 |
| 85 | rf76  | Rhodococcus fascians                 | D188                         | JMET01000000  | 5.44 | 64.6 | 5222 | 50 E (E2) | E2-7 | 0.48 |
| 86 | rf77  | Rhodococcus fascians                 | LMG 3602                     | JMEQ01000000  | 5.36 | 64.5 | 5227 | 53 E (E2) | E2-7 | 0.48 |
| 87 | rf78  | Rhodococcus fascians                 | LMG 3605                     | JMEP01000000  | 5.44 | 64.5 | 5215 | 52 E (E2) | E2-7 | 0.49 |
| 88 | rf79  | Rhodococcus fascians                 | LMG 3616                     | JMEO01000000  | 5.76 | 64.3 | 5567 | 52 E (E2) | E2-7 | 0.45 |
| 89 | rf80  | Rhodococcus fascians                 | LMG 3623 <sup>T</sup>        | JMEN01000000  | 5.78 | 64.4 | 5519 | 52 E (E2) | E2-7 | 0.46 |
| 90 | r45   | Rhodococcus sp.                      | AW25M09                      | CAPS00000000  | 5.64 | 64.1 | 5522 | 50 E (E2) | E2-8 | 0.46 |
| 91 | rc54  | <b>Rhodococcus corynebacteroides</b> | <b>DSM 20151<sup>T</sup></b> | LPZL00000000  | 3.9  | 70.3 | 3607 | 50 F      | F-1  | 0.75 |
| 92 | rkr83 | <b>Rhodococcus kroppenstedtii</b>    | <b>DSM 44908<sup>T</sup></b> | LPZO00000000  | 3.91 | 70.1 | 3650 | 47 F      | F-2  | 0.74 |
| 93 | r94   | Rhodococcus sp.                      | UNC23MFCrub1.1               | JMLQ01000000  | 4.7  | 68.5 | 4440 | 55 F      | F-3  | 0.61 |
| 94 | r109  | Rhodococcus sp.                      | MEB064                       | JXQS01000000  | 4.67 | 67.0 | 4415 | 52 F      | F-4  | 0.62 |



|     |       |                                 |                              |              |       |      |       |      |     |      |
|-----|-------|---------------------------------|------------------------------|--------------|-------|------|-------|------|-----|------|
| 95  | r95   | Rhodococcus sp.                 | UNC363MFTsu5.1               | JMLO01000000 | 5.67  | 69.3 | 5300  | 57 G | G-1 | 0.61 |
| 96  | r106  | Rhodococcus sp.                 | RD6.2                        | CVQP01000000 | 5.57  | 68.4 | 5216  | 64 G | G-2 | 0.62 |
| 97  | rt46  | Rhodococcus triatomae           | BKS 15-14                    | AODO00000000 | 5.83  | 69.0 | 5416  | 57 G | G-3 | 0.59 |
| 98  | rk21  | <b>Rhodococcus kunmingensis</b> | <b>DSM 45001<sup>T</sup></b> | LRRB00000000 | 5.62  | 66.2 | 5234  | 50 - | -   |      |
| 99  | rr28  | Rhodococcus rhodnii             | LMG 5362                     | APMY00000000 | 4.39  | 69.7 | 4251  | 54 - | -   |      |
| 100 | rr91  | Rhodococcus rhodnii             | NRRL B-16535 <sup>T</sup>    | JOAA01000000 | 12.42 | 66.3 | 11568 | 79 - | -   |      |
| 101 | na53  | Nocardia asteroides             | NBRC 15531                   | BAFO02000000 | 6.96  | 69.9 | 6425  | 56 - | -   |      |
| 102 | nb6   | Nocardia brasiliensis           | ATCC 700358                  | NC_018681    | 9.44  | 68.1 | 8769  | 58 - | -   |      |
| 103 | nc7   | Nocardia cyriacigeorgica        | GUH2                         | NC_016887    | 6.19  | 68.4 | 5663  | 58 - | -   |      |
| 104 | nf8   | Nocardia farcinica              | IFM 10152                    | NC_006361    | 6.02  | 70.8 | 5738  | 62 - | -   |      |
| 105 | g3    | Gordonia                        | KTR9                         | NC_018581    | 5.44  | 67.8 | 4985  | 54 - | -   |      |
| 106 | gb4   | Gordonia bronchialis            | DSM 43247                    | NC_013441    | 5.21  | 67.1 | 5038  | 53 - | -   |      |
| 107 | gp5   | Gordonia polyisoprenivorans     | VH2                          | NC_016906    | 5.67  | 67.0 | 5169  | 58 - | -   |      |
| 108 | sr48  | Segniliparus rotundus           | DSM 44985                    | NC_014168    | 3.16  | 66.8 | 3150  | 49 - | -   |      |
| 109 | srg49 | Segniliparus rugosus            | ATCC BAA-974                 | ACZI00000000 | 3.57  | 68.1 | 3535  | 49 - | -   |      |
| 110 | smn50 | Smaragdicoccus niigatensis      | DSM 44881                    | AQXZ00000000 | 5.32  | 64.3 | 5234  | 52 - | -   |      |
| 111 | tb51  | Tomitella biformata             | AHU 1821                     | BAVQ00000000 | 4.71  | 68.1 | 4389  | 56 - | -   |      |
| 112 | w115  | Williamsia sp.                  | ARP1                         | JXYP00000000 | 4.75  | 68.6 | 4460  | 52 - | -   |      |
| 113 | w116  | Williamsia sp.                  | D3                           | AYTE00000000 | 5.62  | 64.6 | 5632  | 51 - | -   |      |
| 114 | cd1   | Corynebacterium diphtheriae     | NCTC 03529                   | AJGI00000000 | 2.48  | 53.6 | 2490  | 56 - | -   |      |
| 115 | cd2   | Corynebacterium diphtheriae     | NCTC 05011                   | AJVH00000000 | 2.38  | 53.6 | 2341  | 51 - | -   |      |

Notes:

1. The strains sequenced in this study are shown in red.
2. The subgroup information is provided in parenthesis in the column "Group".
3. The predicted species from the genomic analyses are coded with numbers following the group/subgroup designation.
4. The fraction of the genes in the core genome within the group is mentioned in the column "Fraction".

Supplementary Table 2A. Pairwise fragment BLAST similarity scores from the genomic sequences

|      | rs16 | rs16b | rs16c | rs16d | rs16e | rs16f | rs16g | rs16h | rs16i | rs16j | rs16k | rs16l | rs16m | rs16n | rs16o | rs16p | rs16q | rs16r | rs16s | rs16t | rs16u | rs16v | rs16w | rs16x | rs16y | rs16z | rs16aa | rs16ab | rs16ac | rs16ad | rs16ae | rs16af | rs16ag | rs16ah | rs16ai | rs16aj | rs16ak | rs16al | rs16am | rs16an | rs16ao | rs16ap | rs16aq | rs16ar | rs16as | rs16at | rs16au | rs16av | rs16aw | rs16ax | rs16ay | rs16az | rs16ba | rs16bb | rs16bc | rs16bd | rs16be | rs16bf | rs16bg | rs16bh | rs16bi | rs16bj | rs16bk | rs16bl | rs16bm | rs16bn | rs16bo | rs16bp | rs16bq | rs16br | rs16bs | rs16bt | rs16bu | rs16bv | rs16bw | rs16bx | rs16by | rs16bz | rs16ca | rs16cb | rs16cc | rs16cd | rs16ce | rs16cf | rs16cg | rs16ch | rs16ci | rs16cj | rs16ck | rs16cl | rs16cm | rs16cn | rs16co | rs16cp | rs16cq | rs16cr | rs16cs | rs16ct | rs16cu | rs16cv | rs16cw | rs16cx | rs16cy | rs16cz | rs16da | rs16db | rs16dc | rs16dd | rs16de | rs16df | rs16dg | rs16dh | rs16di | rs16dj | rs16dk | rs16dl | rs16dm | rs16dn | rs16do | rs16dp | rs16dq | rs16dr | rs16ds | rs16dt | rs16du | rs16dv | rs16dw | rs16dx | rs16dy | rs16dz | rs16ea | rs16eb | rs16ec | rs16ed | rs16ee | rs16ef | rs16eg | rs16eh | rs16ei | rs16ej | rs16ek | rs16el | rs16em | rs16en | rs16eo | rs16ep | rs16eq | rs16er | rs16es | rs16et | rs16eu | rs16ev | rs16ew | rs16ex | rs16ey | rs16ez | rs16fa | rs16fb | rs16fc | rs16fd | rs16fe | rs16ff | rs16fg | rs16fh | rs16fi | rs16fj | rs16fk | rs16fl | rs16fm | rs16fn | rs16fo | rs16fp | rs16fq | rs16fr | rs16fs | rs16ft | rs16fu | rs16fv | rs16fw | rs16fx | rs16fy | rs16fz | rs16ga | rs16gb | rs16gc | rs16gd | rs16ge | rs16gf | rs16gg | rs16gh | rs16gi | rs16gj | rs16gk | rs16gl | rs16gm | rs16gn | rs16go | rs16gp | rs16gq | rs16gr | rs16gs | rs16gt | rs16gu | rs16gv | rs16gw | rs16gx | rs16gy | rs16gz | rs16ha | rs16hb | rs16hc | rs16hd | rs16he | rs16hf | rs16hg | rs16hi | rs16hj | rs16hk | rs16hl | rs16hm | rs16hn | rs16ho | rs16hp | rs16hq | rs16hr | rs16hs | rs16ht | rs16hu | rs16hv | rs16hw | rs16hx | rs16hy | rs16hz | rs16ia | rs16ib | rs16ic | rs16id | rs16ie | rs16if | rs16ig | rs16ih | rs16ii | rs16ij | rs16ik | rs16il | rs16im | rs16in | rs16io | rs16ip | rs16iq | rs16ir | rs16is | rs16it | rs16iu | rs16iv | rs16iw | rs16ix | rs16iy | rs16iz | rs16ja | rs16jb | rs16jc | rs16jd | rs16je | rs16jf | rs16jg | rs16jh | rs16ji | rs16jj | rs16jk | rs16jl | rs16jm | rs16jn | rs16jo | rs16jp | rs16jq | rs16jr | rs16js | rs16jt | rs16ju | rs16jv | rs16jw | rs16jx | rs16jy | rs16jz | rs16ka | rs16kb | rs16kc | rs16kd | rs16ke | rs16kf | rs16kg | rs16kh | rs16ki | rs16kj | rs16kl | rs16km | rs16kn | rs16ko | rs16kp | rs16kq | rs16kr | rs16ks | rs16kt | rs16ku | rs16kv | rs16kw | rs16kx | rs16ky | rs16kz | rs16la | rs16lb | rs16lc | rs16ld | rs16le | rs16lf | rs16lg | rs16lh | rs16li | rs16lj | rs16lk | rs16ll | rs16lm | rs16ln | rs16lo | rs16lp | rs16lq | rs16lr | rs16ls | rs16lt | rs16lu | rs16lv | rs16lw | rs16lx | rs16ly | rs16lz | rs16ma | rs16mb | rs16mc | rs16md | rs16me | rs16mf | rs16mg | rs16mh | rs16mi | rs16mj | rs16mk | rs16ml | rs16mn | rs16mo | rs16mp | rs16mq | rs16mr | rs16ms | rs16mt | rs16mu | rs16mv | rs16mw | rs16mx | rs16my | rs16mz | rs16na | rs16nb | rs16nc | rs16nd | rs16ne | rs16nf | rs16ng | rs16nh | rs16ni | rs16nj | rs16nk | rs16nl | rs16nm | rs16nn | rs16no | rs16np | rs16nq | rs16nr | rs16ns | rs16nt | rs16nu | rs16nv | rs16nw | rs16nx | rs16ny | rs16nz | rs16oa | rs16ob | rs16oc | rs16od | rs16oe | rs16of | rs16og | rs16oh | rs16oi | rs16oj | rs16ok | rs16ol | rs16om | rs16on | rs16oo | rs16op | rs16oq | rs16or | rs16os | rs16ot | rs16ou | rs16ov | rs16ow | rs16ox | rs16oy | rs16oz | rs16pa | rs16pb | rs16pc | rs16pd | rs16pe | rs16pf | rs16pg | rs16ph | rs16pi | rs16pj | rs16pk | rs16pl | rs16pm | rs16pn | rs16po | rs16pp | rs16pq | rs16pr | rs16ps | rs16pt | rs16pu | rs16pv | rs16pw | rs16px | rs16py | rs16pz | rs16qa | rs16qb | rs16qc | rs16qd | rs16qe | rs16qf | rs16qg | rs16qh | rs16qi | rs16qj | rs16qk | rs16ql | rs16qm | rs16qn | rs16qo | rs16qp | rs16qq | rs16qr | rs16qs | rs16qt | rs16qu | rs16qv | rs16qw | rs16qx | rs16qy | rs16qz | rs16ra | rs16rb | rs16rc | rs16rd | rs16re | rs16rf | rs16rg | rs16rh | rs16ri | rs16rj | rs16rk | rs16rl | rs16rm | rs16rn | rs16ro | rs16rp | rs16rq | rs16rr | rs16rs | rs16rt | rs16ru | rs16rv | rs16rw | rs16rx | rs16ry | rs16rz | rs16sa | rs16sb | rs16sc | rs16sd | rs16se | rs16sf | rs16sg | rs16sh | rs16si | rs16sj | rs16sk | rs16sl | rs16sm | rs16sn | rs16so | rs16sp | rs16sq | rs16sr | rs16ss | rs16st | rs16su | rs16sv | rs16sw | rs16sx | rs16sy | rs16sz | rs16ta | rs16tb | rs16tc | rs16td | rs16te | rs16tf | rs16tg | rs16th | rs16ti | rs16tj | rs16tk | rs16tl | rs16tm | rs16tn | rs16to | rs16tp | rs16tq | rs16tr | rs16ts | rs16tt | rs16tu | rs16tv | rs16tw | rs16tx | rs16ty | rs16tz | rs16ua | rs16ub | rs16uc | rs16ud | rs16ue | rs16uf | rs16ug | rs16uh | rs16ui | rs16uj | rs16uk | rs16ul | rs16um | rs16un | rs16uo | rs16up | rs16uq | rs16ur | rs16us | rs16ut | rs16uu | rs16uv | rs16uw | rs16ux | rs16uy | rs16uz | rs16va | rs16vb | rs16vc | rs16vd | rs16ve | rs16vf | rs16vg | rs16vh | rs16vi | rs16vj | rs16vk | rs16vl | rs16vm | rs16vn | rs16vo | rs16vp | rs16vq | rs16vr | rs16vs | rs16vt | rs16vu | rs16vv | rs16vw | rs16vx | rs16vy | rs16vz | rs16wa | rs16wb | rs16wc | rs16wd | rs16we | rs16wf | rs16wg | rs16wh | rs16wi | rs16wj | rs16wk | rs16wl | rs16wm | rs16wn | rs16wo | rs16wp | rs16wq | rs16wr | rs16ws | rs16wt | rs16wu | rs16wv | rs16ww | rs16wx | rs16wy | rs16wz | rs16xa | rs16xb | rs16xc | rs16xd | rs16xe | rs16xf | rs16xg | rs16xh | rs16xi | rs16xj | rs16xk | rs16xl | rs16xm | rs16xn | rs16xo | rs16xp | rs16xq | rs16xr | rs16xs | rs16xt | rs16xu | rs16xv | rs16xw | rs16xx | rs16xy | rs16xz | rs16ya | rs16yb | rs16yc | rs16yd | rs16ye | rs16yf | rs16yg | rs16yh | rs16yi | rs16yj | rs16yk | rs16yl | rs16ym | rs16yn | rs16yo | rs16yp | rs16yq | rs16yr | rs16ys | rs16yt | rs16yu | rs16yv | rs16yw | rs16yx | rs16yy | rs16yz | rs16za | rs16zb | rs16zc | rs16zd | rs16ze | rs16zf | rs16zg | rs16zh | rs16zi | rs16zj | rs16zk | rs16zl | rs16zm | rs16zn | rs16zo | rs16zp | rs16zq | rs16zr | rs16zs | rs16zt | rs16zu | rs16zv | rs16zw | rs16zx | rs16zy | rs16zz |
|------|------|-------|-------|-------|-------|-------|-------|-------|-------|-------|-------|-------|-------|-------|-------|-------|-------|-------|-------|-------|-------|-------|-------|-------|-------|-------|--------|--------|--------|--------|--------|--------|--------|--------|--------|--------|--------|--------|--------|--------|--------|--------|--------|--------|--------|--------|--------|--------|--------|--------|--------|--------|--------|--------|--------|--------|--------|--------|--------|--------|--------|--------|--------|--------|--------|--------|--------|--------|--------|--------|--------|--------|--------|--------|--------|--------|--------|--------|--------|--------|--------|--------|--------|--------|--------|--------|--------|--------|--------|--------|--------|--------|--------|--------|--------|--------|--------|--------|--------|--------|--------|--------|--------|--------|--------|--------|--------|--------|--------|--------|--------|--------|--------|--------|--------|--------|--------|--------|--------|--------|--------|--------|--------|--------|--------|--------|--------|--------|--------|--------|--------|--------|--------|--------|--------|--------|--------|--------|--------|--------|--------|--------|--------|--------|--------|--------|--------|--------|--------|--------|--------|--------|--------|--------|--------|--------|--------|--------|--------|--------|--------|--------|--------|--------|--------|--------|--------|--------|--------|--------|--------|--------|--------|--------|--------|--------|--------|--------|--------|--------|--------|--------|--------|--------|--------|--------|--------|--------|--------|--------|--------|--------|--------|--------|--------|--------|--------|--------|--------|--------|--------|--------|--------|--------|--------|--------|--------|--------|--------|--------|--------|--------|--------|--------|--------|--------|--------|--------|--------|--------|--------|--------|--------|--------|--------|--------|--------|--------|--------|--------|--------|--------|--------|--------|--------|--------|--------|--------|--------|--------|--------|--------|--------|--------|--------|--------|--------|--------|--------|--------|--------|--------|--------|--------|--------|--------|--------|--------|--------|--------|--------|--------|--------|--------|--------|--------|--------|--------|--------|--------|--------|--------|--------|--------|--------|--------|--------|--------|--------|--------|--------|--------|--------|--------|--------|--------|--------|--------|--------|--------|--------|--------|--------|--------|--------|--------|--------|--------|--------|--------|--------|--------|--------|--------|--------|--------|--------|--------|--------|--------|--------|--------|--------|--------|--------|--------|--------|--------|--------|--------|--------|--------|--------|--------|--------|--------|--------|--------|--------|--------|--------|--------|--------|--------|--------|--------|--------|--------|--------|--------|--------|--------|--------|--------|--------|--------|--------|--------|--------|--------|--------|--------|--------|--------|--------|--------|--------|--------|--------|--------|--------|--------|--------|--------|--------|--------|--------|--------|--------|--------|--------|--------|--------|--------|--------|--------|--------|--------|--------|--------|--------|--------|--------|--------|--------|--------|--------|--------|--------|--------|--------|--------|--------|--------|--------|--------|--------|--------|--------|--------|--------|--------|--------|--------|--------|--------|--------|--------|--------|--------|--------|--------|--------|--------|--------|--------|--------|--------|--------|--------|--------|--------|--------|--------|--------|--------|--------|--------|--------|--------|--------|--------|--------|--------|--------|--------|--------|--------|--------|--------|--------|--------|--------|--------|--------|--------|--------|--------|--------|--------|--------|--------|--------|--------|--------|--------|--------|--------|--------|--------|--------|--------|--------|--------|--------|--------|--------|--------|--------|--------|--------|--------|--------|--------|--------|--------|--------|--------|--------|--------|--------|--------|--------|--------|--------|--------|--------|--------|--------|--------|--------|--------|--------|--------|--------|--------|--------|--------|--------|--------|--------|--------|--------|--------|--------|--------|--------|--------|--------|--------|--------|--------|--------|--------|--------|--------|--------|--------|--------|--------|--------|--------|--------|--------|--------|--------|--------|--------|--------|--------|--------|--------|--------|--------|--------|--------|--------|--------|--------|--------|--------|--------|--------|--------|--------|--------|--------|--------|--------|--------|--------|--------|--------|--------|--------|--------|--------|--------|--------|--------|--------|--------|--------|--------|--------|--------|--------|--------|--------|--------|--------|--------|--------|--------|--------|--------|--------|--------|--------|--------|--------|--------|--------|--------|--------|--------|--------|--------|--------|--------|--------|--------|--------|--------|--------|--------|--------|--------|--------|--------|--------|--------|--------|--------|--------|--------|--------|--------|--------|--------|--------|--------|--------|--------|--------|--------|--------|--------|--------|--------|--------|--------|--------|--------|--------|--------|--------|--------|--------|--------|--------|--------|--------|--------|--------|--------|--------|--------|--------|--------|--------|--------|--------|--------|--------|--------|--------|--------|--------|--------|--------|--------|--------|--------|--------|--------|--------|--------|--------|--------|--------|--------|--------|--------|--------|--------|--------|--------|--------|--------|--------|--------|--------|--------|--------|--------|--------|--------|--------|--------|--------|--------|--------|--------|--------|--------|--------|--------|--------|--------|--------|--------|--------|--------|--------|--------|--------|--------|--------|
| rs16 | 100  | 99.99 | 99.98 | 99.97 | 99.96 | 99.95 | 99.94 | 99.93 | 99.92 | 99.91 | 99.90 | 99.89 | 99.88 | 99.87 | 99.86 | 99.85 | 99.84 | 99.83 | 99.82 | 99.81 | 99.80 | 99.79 | 99.78 | 99.77 | 99.76 | 99.75 | 99.74  | 99.73  | 99.72  | 99.71  | 99.70  | 99.69  | 99.68  | 99.67  | 99.66  | 99.65  | 99.64  | 99.63  | 99.62  | 99.61  | 99.60  | 99.59  | 99.58  | 99.57  | 99.56  | 99.55  | 99.54  | 99.53  | 99.52  | 99.51  | 99.50  | 99.49  | 99.48  | 99.47  | 99.46  | 99.45  | 99.44  | 99.43  | 99.42  | 99.41  | 99.40  | 99.39  | 99.38  | 99.37  | 99.36  | 99.35  | 99.34  | 99.33  | 99.32  | 99.31  | 99.30  | 99.29  | 99.28  | 99.27  | 99.26  | 99.25  | 99.24  | 99.23  | 99.22  | 99.21  | 99.20  | 99.19  | 99.18  | 99.17  | 99.16  | 99.15  | 99.14  | 99.13  | 99.12  | 99.11  | 99.10  | 99.09  | 99.08  | 99.07  | 99.06  | 99.05  | 99.04  | 99.03  | 99.02  | 99.01  | 99.00  | 98.99  | 98.98  | 98.97  | 98.96  | 98.95  | 98.94  | 98.93  | 98.92  | 98.91  | 98.90  | 98.89  | 98.88  | 98.87  | 98.86  | 98.85  | 98.84  | 98.83  | 98.82  | 98.81  | 98.80  | 98.79  | 98.78  | 98.77  | 98.76  | 98.75  | 98.74  | 98.73  | 98.72  | 98.71  | 98.70  | 98.69  | 98.68  | 98.67  | 98.66  | 98.65  | 98.64  | 98.63  | 98.62  | 98.61  | 98.60  | 98.59  | 98.58  | 98.57  | 98.56  | 98.55  | 98.54  | 98.53  | 98.52  | 98.51  | 98.50  | 98.49  | 98.48  | 98.47  | 98.46  | 98.45  | 98.44  | 98.43  | 98.42  | 98.41  | 98.40  | 98.39  | 98.38  | 98.37  | 98.36  | 98.35  | 98.34  | 98.33  | 98.32  | 98.31  | 98.30  | 98.29  | 98.28  | 98.27  | 98.26  | 98.25  | 98.24  | 98.23  | 98.22  | 98.21  | 98.20  | 98.19  | 98.18  | 98.17  | 98.16  | 98.15  | 98.14  | 98.13  | 98.12  | 98.11  | 98.10  | 98.09  | 98.08  | 98.07  | 98.06  | 98.05  | 98.04  | 98.03  | 98.02  | 98.01  | 98.00  | 97.99  | 97.98  | 97.97  | 97.96  | 97.95  | 97.94  | 97.93  | 97.92  | 97.91  | 97.90  | 97.89  | 97.88  | 97.87  | 97.86  | 97.85  | 97.84  | 97.83  | 97.82  | 97.81  | 97.80  | 97.79  | 97.78  | 97.77  | 97.76  | 97.75  | 97.74  | 97.73  | 97.72  | 97.71  | 97.70  | 97.69  | 97.68  | 97.67  | 97.66  | 97.65  | 97.64  | 97.63  | 97.62  | 97.61  | 97.60  | 97.59  | 97.58  | 97.57  | 97.56  | 97.55  | 97.54  | 97.53  | 97.52  | 97.51  | 97.50  | 97.49  | 97.48  | 97.47  | 97.46  | 97.45  | 97.44  | 97.43  | 97.42  | 97.41  | 97.40  | 97.39  | 97.38  | 97.37  | 97.36  | 97.35  | 97.34  | 97.33  | 97.32  | 97.31  | 97.30  | 97.29  | 97.28  | 97.27  | 97.26  | 97.25  | 97.24  | 97.23  | 97.22  | 97.21  | 97.20  | 97.19  | 97.18  | 97.17  | 97.16  | 97.15  | 97.14  | 97.13  | 97.12  | 97.11  | 97.10  | 97.09  | 97.08  | 97.07  | 97.06  | 97.05  | 97.04  | 97.03  | 97.02  | 97.01  | 97.00  | 96.99  | 96.98  | 96.97  | 96.96  | 96.95  | 96.94  | 96.93  | 96.92  | 96.91  | 96.90  | 96.89  | 96.88  | 96.87  | 96.86  | 96.85  | 96.84  | 96.83  | 96.82  | 96.81  | 96.80  | 96.79  | 96.78  | 96.77  | 96.76  | 96.75  | 96.74  | 96.73  | 96.72  | 96.71  | 96.70  | 96.69  | 96.68  | 96.67  | 96.66  | 96.65  | 96.64  | 96.63  | 96.62  | 96.61  | 96.60  | 96.59  | 96.58  | 96.57  | 96.56  | 96.55  | 96.54  | 96.53  | 96.52  | 96.51  | 96.50  | 96.49  | 96.48  | 96.47  | 96.46  | 96.45  | 96.44  | 96.43  | 96.42  | 96.41  | 96.40  | 96.39  | 96.38  | 96.37  | 96.36  | 96.35  | 96.34  | 96.33  | 96.32  | 96.31  | 96.30  | 96.29  | 96.28  | 96.27  | 96.26  | 96.25  | 96.24  | 96.23  | 96.22  | 96.21  | 96.20  | 96.19  | 96.18  | 96.17  | 96.16  | 96.15  | 96.14  | 96.13  | 96.12  | 96.11  | 96.10  | 96.09  | 96.08  | 96.07  | 96.06  | 96.05  | 96.04  | 96.03  | 96.02  | 96.01  | 96.00  | 95.99  | 95.98  | 95.97  | 95.96  | 95.95  | 95.94  | 95.93  | 95.92  | 95.91  | 95.90  | 95.89  | 95.88  | 95.87  | 95.86  | 95.85  | 95.84  | 95.83  | 95.82  | 95.81  | 95.80  | 95.79  | 95.78  | 95.77  | 95.76  | 95.75  | 95.74  | 95.73  | 95.72  | 95.71  | 95.70  | 95.69  | 95.68  | 95.67  | 95.66  | 95.65  | 95.64  | 95.63  | 95.62  | 95.61  | 95.60  | 95.59  | 95.58  | 95.57  | 95.56  | 95.55  | 95.54  | 95.53  | 95.52  | 95.51  | 95.50  | 95.49  | 95.48  | 95.47  | 95.46  | 95.45  | 95.44  | 95.43  | 95.42  | 95.41  | 95.40  | 95.39  | 95.38  | 95.37  | 95.36  | 95.35  | 95.34  | 95.33  | 95.32  | 95.31  | 95.30  | 95.29  | 95.28  | 95.27  | 95.26  | 9      |        |        |        |        |        |        |        |        |        |        |        |        |        |        |        |        |        |        |        |        |        |        |        |        |        |        |        |        |        |        |        |        |        |        |        |        |        |        |        |        |        |        |        |        |        |        |        |        |        |        |        |        |        |        |        |        |        |        |        |        |        |        |        |        |        |        |        |        |        |        |        |        |        |        |        |        |        |        |        |        |        |        |        |        |        |        |        |        |        |        |        |        |        |        |        |        |        |        |        |        |        |        |        |        |        |        |        |        |        |        |        |        |        |        |        |        |        |        |        |        |        |        |        |        |        |        |        |        |        |        |        |        |        |        |        |        |        |        |        |        |        |        |        |        |        |        |        |        |        |        |        |        |        |        |        |        |        |        |        |        |        |        |        |        |        |        |        |        |        |        |        |        |        |        |        |        |        |        |        |        |        |        |        |        |        |        |        |        |        |        |        |        |        |        |        |        |        |        |        |        |        |        |        |        |        |        |        |        |        |        |        |        |        |        |        |        |        |        |        |        |        |        |        |

Supplementary table 2b. Pairwise AIC score from the genome sequences

|      |      |      |      |      |      |      |      |      |      |      |      |      |      |      |      |      |      |      |      |      |      |      |      |      |      |      |      |      |      |      |      |      |      |      |      |      |      |      |      |      |      |      |      |      |      |      |      |      |      |      |      |      |      |      |      |      |      |      |      |      |      |      |      |      |      |      |      |      |      |      |      |      |      |      |      |      |      |      |      |      |      |      |      |      |      |      |      |      |      |      |      |      |      |      |      |      |      |      |      |      |      |      |      |      |      |      |      |      |      |      |      |      |      |      |      |      |      |      |      |      |      |      |      |      |      |      |      |      |      |      |      |      |      |      |      |      |      |      |      |      |      |      |      |       |
|------|------|------|------|------|------|------|------|------|------|------|------|------|------|------|------|------|------|------|------|------|------|------|------|------|------|------|------|------|------|------|------|------|------|------|------|------|------|------|------|------|------|------|------|------|------|------|------|------|------|------|------|------|------|------|------|------|------|------|------|------|------|------|------|------|------|------|------|------|------|------|------|------|------|------|------|------|------|------|------|------|------|------|------|------|------|------|------|------|------|------|------|------|------|------|------|------|------|------|------|------|------|------|------|------|------|------|------|------|------|------|------|------|------|------|------|------|------|------|------|------|------|------|------|------|------|------|------|------|------|------|------|------|------|------|------|------|------|------|------|------|------|------|------|-------|
| e01  | e02  | e03  | e04  | e05  | e06  | e07  | e08  | e09  | e10  | e11  | e12  | e13  | e14  | e15  | e16  | e17  | e18  | e19  | e20  | e21  | e22  | e23  | e24  | e25  | e26  | e27  | e28  | e29  | e30  | e31  | e32  | e33  | e34  | e35  | e36  | e37  | e38  | e39  | e40  | e41  | e42  | e43  | e44  | e45  | e46  | e47  | e48  | e49  | e50  | e51  | e52  | e53  | e54  | e55  | e56  | e57  | e58  | e59  | e60  | e61  | e62  | e63  | e64  | e65  | e66  | e67  | e68  | e69  | e70  | e71  | e72  | e73  | e74  | e75  | e76  | e77  | e78  | e79  | e80  | e81  | e82  | e83  | e84  | e85  | e86  | e87  | e88  | e89  | e90  | e91  | e92  | e93  | e94  | e95  | e96  | e97  | e98  | e99  | e100 |      |      |      |      |      |      |      |      |      |      |      |      |      |      |      |      |      |      |      |      |      |      |      |      |      |      |      |      |      |      |      |      |      |      |      |      |      |      |      |      |      |      |      |      |       |
| 9856 | 9857 | 9858 | 9859 | 9860 | 9861 | 9862 | 9863 | 9864 | 9865 | 9866 | 9867 | 9868 | 9869 | 9870 | 9871 | 9872 | 9873 | 9874 | 9875 | 9876 | 9877 | 9878 | 9879 | 9880 | 9881 | 9882 | 9883 | 9884 | 9885 | 9886 | 9887 | 9888 | 9889 | 9890 | 9891 | 9892 | 9893 | 9894 | 9895 | 9896 | 9897 | 9898 | 9899 | 9900 | 9901 | 9902 | 9903 | 9904 | 9905 | 9906 | 9907 | 9908 | 9909 | 9910 | 9911 | 9912 | 9913 | 9914 | 9915 | 9916 | 9917 | 9918 | 9919 | 9920 | 9921 | 9922 | 9923 | 9924 | 9925 | 9926 | 9927 | 9928 | 9929 | 9930 | 9931 | 9932 | 9933 | 9934 | 9935 | 9936 | 9937 | 9938 | 9939 | 9940 | 9941 | 9942 | 9943 | 9944 | 9945 | 9946 | 9947 | 9948 | 9949 | 9950 | 9951 | 9952 | 9953 | 9954 | 9955 | 9956 | 9957 | 9958 | 9959 | 9960 | 9961 | 9962 | 9963 | 9964 | 9965 | 9966 | 9967 | 9968 | 9969 | 9970 | 9971 | 9972 | 9973 | 9974 | 9975 | 9976 | 9977 | 9978 | 9979 | 9980 | 9981 | 9982 | 9983 | 9984 | 9985 | 9986 | 9987 | 9988 | 9989 | 9990 | 9991 | 9992 | 9993 | 9994 | 9995 | 9996 | 9997 | 9998 | 9999 | 10000 |



Supplementary Table 24. Pairwise AI similarity scores from 255 core genes

|     |     |     |     |     |     |     |     |     |     |     |     |     |     |     |     |     |     |     |     |     |     |     |     |     |     |     |     |     |     |     |     |     |     |     |     |     |     |     |     |     |     |     |     |     |     |     |     |     |     |     |     |     |     |     |     |     |     |     |     |     |     |     |     |     |     |     |     |     |     |     |     |     |     |     |     |     |     |     |     |     |     |     |     |     |     |     |     |     |     |     |     |     |     |     |     |     |     |     |     |      |      |      |      |      |      |      |      |      |      |      |      |      |      |      |      |      |      |      |      |      |      |      |      |      |      |      |      |      |      |      |      |      |      |      |      |      |      |      |      |      |      |      |      |      |      |      |      |      |      |      |      |      |      |      |      |      |      |      |      |      |      |      |      |      |      |      |      |      |      |      |      |      |      |      |      |      |      |      |      |      |      |      |      |      |      |      |      |      |      |      |      |      |      |      |      |      |      |      |      |      |      |      |      |      |      |      |      |      |      |      |      |      |      |      |      |      |      |      |      |      |      |      |      |      |      |      |      |      |      |      |      |      |      |      |      |      |      |      |      |      |      |      |      |      |      |      |      |      |      |      |      |      |      |      |      |      |      |      |      |      |      |      |      |      |      |      |      |      |      |      |      |      |      |      |      |      |      |      |      |      |      |      |      |      |      |      |      |      |      |      |      |      |      |      |      |      |      |      |      |      |      |      |      |      |      |      |      |      |      |      |      |      |      |      |      |      |      |      |      |      |      |      |      |      |      |      |      |      |      |      |      |      |      |      |      |      |      |      |      |      |      |      |      |      |      |      |      |      |      |      |      |      |      |      |      |      |      |      |      |      |      |      |      |      |      |      |      |      |      |      |      |      |      |      |      |      |      |      |      |      |      |      |      |      |      |      |      |      |      |      |      |      |      |      |      |      |      |      |      |      |      |      |      |      |      |      |      |      |      |      |      |      |      |      |      |      |      |      |      |      |      |      |      |      |      |      |      |      |      |      |      |      |      |      |      |      |      |      |      |      |      |      |      |      |      |      |      |      |      |      |      |      |      |      |      |      |      |      |      |      |      |      |      |      |      |      |      |      |      |      |      |      |      |      |      |      |      |      |      |      |      |      |      |      |      |      |      |      |      |      |      |      |      |      |      |      |      |      |      |      |      |      |      |      |      |      |      |      |      |      |      |      |      |      |      |      |      |      |      |      |      |      |      |      |      |      |      |      |      |      |      |      |      |      |      |      |      |      |      |      |      |      |      |      |      |      |      |      |      |      |      |      |      |      |      |      |      |      |      |      |      |      |      |      |      |      |      |      |      |      |      |      |      |      |      |      |      |      |      |      |      |      |      |      |      |      |      |      |      |      |      |      |      |      |      |      |      |      |      |      |      |      |      |      |      |      |      |      |      |      |      |      |      |      |      |      |      |      |      |      |      |      |      |      |      |      |      |      |      |      |      |      |      |      |      |      |      |      |      |      |      |      |      |      |      |      |      |      |      |      |      |      |      |      |      |      |      |      |      |      |      |      |      |      |      |      |      |      |      |      |      |      |      |      |      |      |      |      |      |      |      |      |      |      |      |      |      |      |      |      |      |      |      |      |      |      |      |      |      |      |      |      |      |      |      |      |      |      |      |      |      |      |      |      |      |      |      |      |      |      |      |      |      |      |      |      |      |      |      |      |      |      |      |      |      |      |      |      |      |      |      |      |      |      |      |      |      |      |      |      |      |      |      |      |      |      |      |      |      |      |      |      |      |      |      |      |      |      |      |      |      |      |      |      |      |      |      |      |      |      |      |      |      |      |      |      |      |      |      |      |      |      |      |      |      |      |      |      |      |      |      |      |      |      |      |      |      |      |      |      |      |      |      |      |      |      |      |      |      |      |      |      |      |      |      |      |      |      |      |      |      |      |      |      |      |      |      |      |      |      |      |      |      |      |      |      |      |      |      |      |      |      |      |      |      |      |      |      |      |      |      |      |      |      |      |      |      |      |      |      |      |      |      |      |      |      |      |      |      |      |      |      |      |      |      |      |      |      |      |      |      |      |      |      |      |      |      |      |      |      |      |      |      |      |      |      |      |      |      |      |      |      |      |      |      |      |      |      |      |      |      |      |      |      |      |      |      |      |      |      |      |      |      |      |      |      |      |      |      |      |      |      |      |      |      |      |      |      |      |      |      |      |      |      |      |      |      |      |      |      |      |      |      |      |      |      |      |      |      |      |      |      |      |      |      |      |      |      |      |      |      |      |      |      |      |      |      |      |      |      |      |      |      |      |      |      |      |      |      |       |
|-----|-----|-----|-----|-----|-----|-----|-----|-----|-----|-----|-----|-----|-----|-----|-----|-----|-----|-----|-----|-----|-----|-----|-----|-----|-----|-----|-----|-----|-----|-----|-----|-----|-----|-----|-----|-----|-----|-----|-----|-----|-----|-----|-----|-----|-----|-----|-----|-----|-----|-----|-----|-----|-----|-----|-----|-----|-----|-----|-----|-----|-----|-----|-----|-----|-----|-----|-----|-----|-----|-----|-----|-----|-----|-----|-----|-----|-----|-----|-----|-----|-----|-----|-----|-----|-----|-----|-----|-----|-----|-----|-----|-----|-----|-----|-----|-----|-----|-----|-----|------|------|------|------|------|------|------|------|------|------|------|------|------|------|------|------|------|------|------|------|------|------|------|------|------|------|------|------|------|------|------|------|------|------|------|------|------|------|------|------|------|------|------|------|------|------|------|------|------|------|------|------|------|------|------|------|------|------|------|------|------|------|------|------|------|------|------|------|------|------|------|------|------|------|------|------|------|------|------|------|------|------|------|------|------|------|------|------|------|------|------|------|------|------|------|------|------|------|------|------|------|------|------|------|------|------|------|------|------|------|------|------|------|------|------|------|------|------|------|------|------|------|------|------|------|------|------|------|------|------|------|------|------|------|------|------|------|------|------|------|------|------|------|------|------|------|------|------|------|------|------|------|------|------|------|------|------|------|------|------|------|------|------|------|------|------|------|------|------|------|------|------|------|------|------|------|------|------|------|------|------|------|------|------|------|------|------|------|------|------|------|------|------|------|------|------|------|------|------|------|------|------|------|------|------|------|------|------|------|------|------|------|------|------|------|------|------|------|------|------|------|------|------|------|------|------|------|------|------|------|------|------|------|------|------|------|------|------|------|------|------|------|------|------|------|------|------|------|------|------|------|------|------|------|------|------|------|------|------|------|------|------|------|------|------|------|------|------|------|------|------|------|------|------|------|------|------|------|------|------|------|------|------|------|------|------|------|------|------|------|------|------|------|------|------|------|------|------|------|------|------|------|------|------|------|------|------|------|------|------|------|------|------|------|------|------|------|------|------|------|------|------|------|------|------|------|------|------|------|------|------|------|------|------|------|------|------|------|------|------|------|------|------|------|------|------|------|------|------|------|------|------|------|------|------|------|------|------|------|------|------|------|------|------|------|------|------|------|------|------|------|------|------|------|------|------|------|------|------|------|------|------|------|------|------|------|------|------|------|------|------|------|------|------|------|------|------|------|------|------|------|------|------|------|------|------|------|------|------|------|------|------|------|------|------|------|------|------|------|------|------|------|------|------|------|------|------|------|------|------|------|------|------|------|------|------|------|------|------|------|------|------|------|------|------|------|------|------|------|------|------|------|------|------|------|------|------|------|------|------|------|------|------|------|------|------|------|------|------|------|------|------|------|------|------|------|------|------|------|------|------|------|------|------|------|------|------|------|------|------|------|------|------|------|------|------|------|------|------|------|------|------|------|------|------|------|------|------|------|------|------|------|------|------|------|------|------|------|------|------|------|------|------|------|------|------|------|------|------|------|------|------|------|------|------|------|------|------|------|------|------|------|------|------|------|------|------|------|------|------|------|------|------|------|------|------|------|------|------|------|------|------|------|------|------|------|------|------|------|------|------|------|------|------|------|------|------|------|------|------|------|------|------|------|------|------|------|------|------|------|------|------|------|------|------|------|------|------|------|------|------|------|------|------|------|------|------|------|------|------|------|------|------|------|------|------|------|------|------|------|------|------|------|------|------|------|------|------|------|------|------|------|------|------|------|------|------|------|------|------|------|------|------|------|------|------|------|------|------|------|------|------|------|------|------|------|------|------|------|------|------|------|------|------|------|------|------|------|------|------|------|------|------|------|------|------|------|------|------|------|------|------|------|------|------|------|------|------|------|------|------|------|------|------|------|------|------|------|------|------|------|------|------|------|------|------|------|------|------|------|------|------|------|------|------|------|------|------|------|------|------|------|------|------|------|------|------|------|------|------|------|------|------|------|------|------|------|------|------|------|------|------|------|------|------|------|------|------|------|------|------|------|------|------|------|------|------|------|------|------|------|------|------|------|------|------|------|------|------|------|------|------|------|------|------|------|------|------|------|------|------|------|------|------|------|------|------|------|------|------|------|------|------|------|------|------|------|------|------|------|------|------|------|------|------|------|------|------|------|------|------|------|------|------|------|------|------|------|------|------|------|------|------|------|------|------|------|------|------|------|------|------|------|------|------|------|------|------|------|------|------|------|------|------|------|------|------|------|------|------|------|------|------|------|------|------|------|------|------|------|------|------|------|------|------|------|------|------|------|------|------|------|------|------|------|------|------|------|------|------|------|------|------|------|------|------|------|------|------|------|------|------|------|------|------|------|------|------|------|------|-------|
| r00 | r01 | r02 | r03 | r04 | r05 | r06 | r07 | r08 | r09 | r10 | r11 | r12 | r13 | r14 | r15 | r16 | r17 | r18 | r19 | r20 | r21 | r22 | r23 | r24 | r25 | r26 | r27 | r28 | r29 | r30 | r31 | r32 | r33 | r34 | r35 | r36 | r37 | r38 | r39 | r40 | r41 | r42 | r43 | r44 | r45 | r46 | r47 | r48 | r49 | r50 | r51 | r52 | r53 | r54 | r55 | r56 | r57 | r58 | r59 | r60 | r61 | r62 | r63 | r64 | r65 | r66 | r67 | r68 | r69 | r70 | r71 | r72 | r73 | r74 | r75 | r76 | r77 | r78 | r79 | r80 | r81 | r82 | r83 | r84 | r85 | r86 | r87 | r88 | r89 | r90 | r91 | r92 | r93 | r94 | r95 | r96 | r97 | r98 | r99 | r100 | r101 | r102 | r103 | r104 | r105 | r106 | r107 | r108 | r109 | r110 | r111 | r112 | r113 | r114 | r115 | r116 | r117 | r118 | r119 | r120 | r121 | r122 | r123 | r124 | r125 | r126 | r127 | r128 | r129 | r130 | r131 | r132 | r133 | r134 | r135 | r136 | r137 | r138 | r139 | r140 | r141 | r142 | r143 | r144 | r145 | r146 | r147 | r148 | r149 | r150 | r151 | r152 | r153 | r154 | r155 | r156 | r157 | r158 | r159 | r160 | r161 | r162 | r163 | r164 | r165 | r166 | r167 | r168 | r169 | r170 | r171 | r172 | r173 | r174 | r175 | r176 | r177 | r178 | r179 | r180 | r181 | r182 | r183 | r184 | r185 | r186 | r187 | r188 | r189 | r190 | r191 | r192 | r193 | r194 | r195 | r196 | r197 | r198 | r199 | r200 | r201 | r202 | r203 | r204 | r205 | r206 | r207 | r208 | r209 | r210 | r211 | r212 | r213 | r214 | r215 | r216 | r217 | r218 | r219 | r220 | r221 | r222 | r223 | r224 | r225 | r226 | r227 | r228 | r229 | r230 | r231 | r232 | r233 | r234 | r235 | r236 | r237 | r238 | r239 | r240 | r241 | r242 | r243 | r244 | r245 | r246 | r247 | r248 | r249 | r250 | r251 | r252 | r253 | r254 | r255 | r256 | r257 | r258 | r259 | r260 | r261 | r262 | r263 | r264 | r265 | r266 | r267 | r268 | r269 | r270 | r271 | r272 | r273 | r274 | r275 | r276 | r277 | r278 | r279 | r280 | r281 | r282 | r283 | r284 | r285 | r286 | r287 | r288 | r289 | r290 | r291 | r292 | r293 | r294 | r295 | r296 | r297 | r298 | r299 | r300 | r301 | r302 | r303 | r304 | r305 | r306 | r307 | r308 | r309 | r310 | r311 | r312 | r313 | r314 | r315 | r316 | r317 | r318 | r319 | r320 | r321 | r322 | r323 | r324 | r325 | r326 | r327 | r328 | r329 | r330 | r331 | r332 | r333 | r334 | r335 | r336 | r337 | r338 | r339 | r340 | r341 | r342 | r343 | r344 | r345 | r346 | r347 | r348 | r349 | r350 | r351 | r352 | r353 | r354 | r355 | r356 | r357 | r358 | r359 | r360 | r361 | r362 | r363 | r364 | r365 | r366 | r367 | r368 | r369 | r370 | r371 | r372 | r373 | r374 | r375 | r376 | r377 | r378 | r379 | r380 | r381 | r382 | r383 | r384 | r385 | r386 | r387 | r388 | r389 | r390 | r391 | r392 | r393 | r394 | r395 | r396 | r397 | r398 | r399 | r400 | r401 | r402 | r403 | r404 | r405 | r406 | r407 | r408 | r409 | r410 | r411 | r412 | r413 | r414 | r415 | r416 | r417 | r418 | r419 | r420 | r421 | r422 | r423 | r424 | r425 | r426 | r427 | r428 | r429 | r430 | r431 | r432 | r433 | r434 | r435 | r436 | r437 | r438 | r439 | r440 | r441 | r442 | r443 | r444 | r445 | r446 | r447 | r448 | r449 | r450 | r451 | r452 | r453 | r454 | r455 | r456 | r457 | r458 | r459 | r460 | r461 | r462 | r463 | r464 | r465 | r466 | r467 | r468 | r469 | r470 | r471 | r472 | r473 | r474 | r475 | r476 | r477 | r478 | r479 | r480 | r481 | r482 | r483 | r484 | r485 | r486 | r487 | r488 | r489 | r490 | r491 | r492 | r493 | r494 | r495 | r496 | r497 | r498 | r499 | r500 | r501 | r502 | r503 | r504 | r505 | r506 | r507 | r508 | r509 | r510 | r511 | r512 | r513 | r514 | r515 | r516 | r517 | r518 | r519 | r520 | r521 | r522 | r523 | r524 | r525 | r526 | r527 | r528 | r529 | r530 | r531 | r532 | r533 | r534 | r535 | r536 | r537 | r538 | r539 | r540 | r541 | r542 | r543 | r544 | r545 | r546 | r547 | r548 | r549 | r550 | r551 | r552 | r553 | r554 | r555 | r556 | r557 | r558 | r559 | r560 | r561 | r562 | r563 | r564 | r565 | r566 | r567 | r568 | r569 | r570 | r571 | r572 | r573 | r574 | r575 | r576 | r577 | r578 | r579 | r580 | r581 | r582 | r583 | r584 | r585 | r586 | r587 | r588 | r589 | r590 | r591 | r592 | r593 | r594 | r595 | r596 | r597 | r598 | r599 | r600 | r601 | r602 | r603 | r604 | r605 | r606 | r607 | r608 | r609 | r610 | r611 | r612 | r613 | r614 | r615 | r616 | r617 | r618 | r619 | r620 | r621 | r622 | r623 | r624 | r625 | r626 | r627 | r628 | r629 | r630 | r631 | r632 | r633 | r634 | r635 | r636 | r637 | r638 | r639 | r640 | r641 | r642 | r643 | r644 | r645 | r646 | r647 | r648 | r649 | r650 | r651 | r652 | r653 | r654 | r655 | r656 | r657 | r658 | r659 | r660 | r661 | r662 | r663 | r664 | r665 | r666 | r667 | r668 | r669 | r670 | r671 | r672 | r673 | r674 | r675 | r676 | r677 | r678 | r679 | r680 | r681 | r682 | r683 | r684 | r685 | r686 | r687 | r688 | r689 | r690 | r691 | r692 | r693 | r694 | r695 | r696 | r697 | r698 | r699 | r700 | r701 | r702 | r703 | r704 | r705 | r706 | r707 | r708 | r709 | r710 | r711 | r712 | r713 | r714 | r715 | r716 | r717 | r718 | r719 | r720 | r721 | r722 | r723 | r724 | r725 | r726 | r727 | r728 | r729 | r730 | r731 | r732 | r733 | r734 | r735 | r736 | r737 | r738 | r739 | r740 | r741 | r742 | r743 | r744 | r745 | r746 | r747 | r748 | r749 | r750 | r751 | r752 | r753 | r754 | r755 | r756 | r757 | r758 | r759 | r760 | r761 | r762 | r763 | r764 | r765 | r766 | r767 | r768 | r769 | r770 | r771 | r772 | r773 | r774 | r775 | r776 | r777 | r778 | r779 | r780 | r781 | r782 | r783 | r784 | r785 | r786 | r787 | r788 | r789 | r790 | r791 | r792 | r793 | r794 | r795 | r796 | r797 | r798 | r799 | r800 | r801 | r802 | r803 | r804 | r805 | r806 | r807 | r808 | r809 | r810 | r811 | r812 | r813 | r814 | r815 | r816 | r817 | r818 | r819 | r820 | r821 | r822 | r823 | r824 | r825 | r826 | r827 | r828 | r829 | r830 | r831 | r832 | r833 | r834 | r835 | r836 | r837 | r838 | r839 | r840 | r841 | r842 | r843 | r844 | r845 | r846 | r847 | r848 | r849 | r850 | r851 | r852 | r853 | r854 | r855 | r856 | r857 | r858 | r859 | r860 | r861 | r862 | r863 | r864 | r865 | r866 | r867 | r868 | r869 | r870 | r871 | r872 | r873 | r874 | r875 | r876 | r877 | r878 | r879 | r880 | r881 | r882 | r883 | r884 | r885 | r886 | r887 | r888 | r889 | r890 | r891 | r892 | r893 | r894 | r895 | r896 | r897 | r898 | r899 | r900 | r901 | r902 | r903 | r904 | r905 | r906 | r907 | r908 | r909 | r910 | r911 | r912 | r913 | r914 | r915 | r916 | r917 | r918 | r919 | r920 | r921 | r922 | r923 | r924 | r925 | r926 | r927 | r928 | r929 | r930 | r931 | r932 | r933 | r934 | r935 | r936 | r937 | r938 | r939 | r940 | r941 | r942 | r943 | r944 | r945 | r946 | r947 | r948 | r949 | r950 | r951 | r952 | r953 | r954 | r955 | r956 | r957 | r958 | r959 | r960 | r961 | r962 | r963 | r964 | r965 | r966 | r967 | r968 | r969 | r970 | r971 | r972 | r973 | r974 | r975 | r976 | r977 | r978 | r979 | r980 | r981 | r982 | r983 | r984 | r985 | r986 | r987 | r988 | r989 | r990 | r991 | r992 | r993 | r994 | r995 | r996 | r997 | r998 | r999 | r1000 |
|-----|-----|-----|-----|-----|-----|-----|-----|-----|-----|-----|-----|-----|-----|-----|-----|-----|-----|-----|-----|-----|-----|-----|-----|-----|-----|-----|-----|-----|-----|-----|-----|-----|-----|-----|-----|-----|-----|-----|-----|-----|-----|-----|-----|-----|-----|-----|-----|-----|-----|-----|-----|-----|-----|-----|-----|-----|-----|-----|-----|-----|-----|-----|-----|-----|-----|-----|-----|-----|-----|-----|-----|-----|-----|-----|-----|-----|-----|-----|-----|-----|-----|-----|-----|-----|-----|-----|-----|-----|-----|-----|-----|-----|-----|-----|-----|-----|-----|-----|-----|------|------|------|------|------|------|------|------|------|------|------|------|------|------|------|------|------|------|------|------|------|------|------|------|------|------|------|------|------|------|------|------|------|------|------|------|------|------|------|------|------|------|------|------|------|------|------|------|------|------|------|------|------|------|------|------|------|------|------|------|------|------|------|------|------|------|------|------|------|------|------|------|------|------|------|------|------|------|------|------|------|------|------|------|------|------|------|------|------|------|------|------|------|------|------|------|------|------|------|------|------|------|------|------|------|------|------|------|------|------|------|------|------|------|------|------|------|------|------|------|------|------|------|------|------|------|------|------|------|------|------|------|------|------|------|------|------|------|------|------|------|------|------|------|------|------|------|------|------|------|------|------|------|------|------|------|------|------|------|------|------|------|------|------|------|------|------|------|------|------|------|------|------|------|------|------|------|------|------|------|------|------|------|------|------|------|------|------|------|------|------|------|------|------|------|------|------|------|------|------|------|------|------|------|------|------|------|------|------|------|------|------|------|------|------|------|------|------|------|------|------|------|------|------|------|------|------|------|------|------|------|------|------|------|------|------|------|------|------|------|------|------|------|------|------|------|------|------|------|------|------|------|------|------|------|------|------|------|------|------|------|------|------|------|------|------|------|------|------|------|------|------|------|------|------|------|------|------|------|------|------|------|------|------|------|------|------|------|------|------|------|------|------|------|------|------|------|------|------|------|------|------|------|------|------|------|------|------|------|------|------|------|------|------|------|------|------|------|------|------|------|------|------|------|------|------|------|------|------|------|------|------|------|------|------|------|------|------|------|------|------|------|------|------|------|------|------|------|------|------|------|------|------|------|------|------|------|------|------|------|------|------|------|------|------|------|------|------|------|------|------|------|------|------|------|------|------|------|------|------|------|------|------|------|------|------|------|------|------|------|------|------|------|------|------|------|------|------|------|------|------|------|------|------|------|------|------|------|------|------|------|------|------|------|------|------|------|------|------|------|------|------|------|------|------|------|------|------|------|------|------|------|------|------|------|------|------|------|------|------|------|------|------|------|------|------|------|------|------|------|------|------|------|------|------|------|------|------|------|------|------|------|------|------|------|------|------|------|------|------|------|------|------|------|------|------|------|------|------|------|------|------|------|------|------|------|------|------|------|------|------|------|------|------|------|------|------|------|------|------|------|------|------|------|------|------|------|------|------|------|------|------|------|------|------|------|------|------|------|------|------|------|------|------|------|------|------|------|------|------|------|------|------|------|------|------|------|------|------|------|------|------|------|------|------|------|------|------|------|------|------|------|------|------|------|------|------|------|------|------|------|------|------|------|------|------|------|------|------|------|------|------|------|------|------|------|------|------|------|------|------|------|------|------|------|------|------|------|------|------|------|------|------|------|------|------|------|------|------|------|------|------|------|------|------|------|------|------|------|------|------|------|------|------|------|------|------|------|------|------|------|------|------|------|------|------|------|------|------|------|------|------|------|------|------|------|------|------|------|------|------|------|------|------|------|------|------|------|------|------|------|------|------|------|------|------|------|------|------|------|------|------|------|------|------|------|------|------|------|------|------|------|------|------|------|------|------|------|------|------|------|------|------|------|------|------|------|------|------|------|------|------|------|------|------|------|------|------|------|------|------|------|------|------|------|------|------|------|------|------|------|------|------|------|------|------|------|------|------|------|------|------|------|------|------|------|------|------|------|------|------|------|------|------|------|------|------|------|------|------|------|------|------|------|------|------|------|------|------|------|------|------|------|------|------|------|------|------|------|------|------|------|------|------|------|------|------|------|------|------|------|------|------|------|------|------|------|------|------|------|------|------|------|------|------|------|------|------|------|------|------|------|------|------|------|------|------|------|------|------|------|------|------|------|------|------|------|------|------|------|------|------|------|------|------|------|------|------|------|------|------|------|------|------|------|------|------|------|------|------|------|------|------|------|------|------|------|------|------|------|------|------|------|------|------|------|------|------|------|------|------|------|------|------|------|------|------|------|------|------|------|------|------|------|------|------|------|------|------|------|------|------|------|------|------|------|------|------|------|------|------|------|------|------|------|------|------|------|------|------|------|------|------|------|------|------|------|------|------|------|-------|

Supplementary Table 3. GGDC analyses within each phylogenetic group

| Group A       |                  |      |            |             |          |                  |
|---------------|------------------|------|------------|-------------|----------|------------------|
| Query genome  | Reference genome | DDH  | Model C.I. | Bootstrap   | Distance | Prob. DDH >= 70% |
| NC_014659     | LRRF00000000     | 93.1 | 1.71       | 93.1 - 93.1 | 0.0087   | 96.73            |
| NC_014659     | APJC00000000     | 91.5 | 1.40055    | 91.5 - 91.5 | 0.0105   | 96.26            |
| NC_014659     | LRQY00000000     | 93.1 | 1.71       | 93.1 - 93.1 | 0.0087   | 96.73            |
| NC_014659     | LRQZ00000000     | 90.8 | 2.02       | 90.8 - 90.8 | 0.0112   | 96.07            |
| NC_014659     | LARRA00000000    | 93.1 | 1.7        | 93.1 - 93.2 | 0.0087   | 96.74            |
| NC_014659     | NZ_CM001149      | 92   | 1.2636     | 92 - 92%    | 0.01     | 96.42            |
| NC_014659     | JPOC00000000     | 27   | 3.020253   | 27 - 27%    | 0.1603   | 0.03             |
|               |                  |      |            |             |          |                  |
| Group B1-1    |                  |      |            |             |          |                  |
| Query genome  | Reference genome | DDH  | Model C.I. | Bootstrap   | Distance | Prob. DDH >= 70% |
| NZ_CP011341.1 | LRRLO00000000    | 44.6 | 2.56       | 44.6 - 44.6 | 0.0852   | 7.67             |
| NZ_CP011341.1 | LPZN00000000     | 21.4 | 2.34       | 21.4 - 21.4 | 0.2055   | 0                |
| NZ_CP011341.1 | LRRK00000000     | 21.6 | 2.35       | 21.6 - 21.7 | 0.2027   | 0                |
| NZ_CP011341.1 | LRRIO00000000    | 21.5 | 2.34       | 21.5 - 21.5 | 0.2041   | 0                |
| NZ_CP011341.1 | AVAE00000000     | 92.2 | 2.575147   | 92.1 - 92.2 | 0.0098   | 96.47            |
| NZ_CP011341.1 | AZHI00000000     | 92.9 | 2.791065   | 92.9 - 92.9 | 0.0089   | 96.68            |
| NZ_CP011341.1 | CAVJ00000000     | 94.5 | 2.854621   | 94.5 - 94.5 | 0.0072   | 97.08            |
| NZ_CP011341.1 | AJVB00000000     | 22   | 2.920821   | 22 - 22%    | 0.1994   | 0                |
| NZ_CP011341.1 | AGVW00000000     | 21.6 | 2.966245   | 21.6 - 21.6 | 0.2032   | 0                |
| NZ_CP011341.1 | AFAQ00000000     | 21.4 | 2.888954   | 21.4 - 21.4 | 0.2051   | 0                |
| NZ_CP011341.1 | AHBW00000000     | 21.6 | 2.966435   | 21.6 - 21.6 | 0.2031   | 0                |
| NZ_CP011341.1 | JPJJ01000000     | 21.5 | 2.961796   | 21.5 - 21.5 | 0.2045   | 0                |
| NZ_CP011341.1 | JTIZ01000000     | 21.5 | 2.957577   | 21.5 - 21.5 | 0.2045   | 0                |
| NZ_CP011341.1 | NC_023150        | 21.5 | 2.97309    | 21.5 - 21.5 | 0.2042   | 0                |
| NZ_CP011341.1 | LRRH00000000     | 22.7 | 2.37       | 22.7 - 22.7 | 0.1932   | 0                |
| NZ_CP011341.1 | AJFC00000000     | 45   | 3.333403   | 45 - 45%    | 0.0844   | 8.16             |
| NZ_CP011341.1 | CCSD01000000     | 44.8 | 3.306344   | 44.7 - 44.8 | 0.0849   | 7.83             |
| NZ_CP011341.1 | LDUF01000000     | 44.8 | 3.327868   | 44.8 - 44.8 | 0.0848   | 7.89             |
| NZ_CP011341.1 | ANGC00000000     | 44.7 | 3.339426   | 44.7 - 44.7 | 0.0852   | 7.68             |
| NZ_CP011341.1 | AOEX00000000     | 43.5 | 3.256966   | 43.5 - 43.5 | 0.0886   | 6.05             |
|               |                  |      |            |             |          |                  |
| Group B1-2    |                  |      |            |             |          |                  |
| Query genome  | Reference genome | DDH  | Model C.I. | Bootstrap   | Distance | Prob. DDH >= 70% |
| LRRLO00000000 | AVAE00000000     | 44.1 | 2.55       | 44.1 - 44.1 | 0.0869   | 6.83             |
| LRRLO00000000 | AFAQ00000000     | 21.5 | 2.34       | 21.5 - 21.5 | 0.2046   | 0                |
| LRRLO00000000 | CAVJ00000000     | 44.9 | 2.56       | 44.9 - 44.9 | 0.0844   | 8.11             |
| LRRLO00000000 | AJVB00000000     | 22   | 2.35       | 22 - 22%    | 0.1993   | 0                |
| LRRLO00000000 | AJFC00000000     | 93   | 1.73       | 93 - 93%    | 0.0089   | 96.69            |
| LRRLO00000000 | JPJJ01000000     | 21.6 | 2.35       | 21.6 - 21.6 | 0.2028   | 0                |
| LRRLO00000000 | JTIZ01000000     | 21.6 | 2.35       | 21.6 - 21.6 | 0.203    | 0                |
| LRRLO00000000 | NZ_CP011341.1    | 44.6 | 2.56       | 44.6 - 44.6 | 0.0852   | 7.67             |
| LRRLO00000000 | LPZN00000000     | 21.4 | 2.34       | 21.4 - 21.4 | 0.2056   | 0                |
| LRRLO00000000 | NC_023150        | 21.6 | 2.35       | 21.6 - 21.6 | 0.2028   | 0                |
| LRRLO00000000 | AHBW00000000     | 21.8 | 2.35       | 21.8 - 21.8 | 0.2015   | 0                |
| LRRLO00000000 | LRRIO00000000    | 21.5 | 2.34       | 21.5 - 21.5 | 0.2037   | 0                |
| LRRLO00000000 | LRRH00000000     | 22.6 | 2.36       | 22.6 - 22.6 | 0.1936   | 0                |

|                   |                  |      |               |             |          |                  |
|-------------------|------------------|------|---------------|-------------|----------|------------------|
| LRRLO0000000      | ANGC000000000    | 94.8 | 1.43          | 94.8 - 94.8 | 0.0068   | 97.16            |
| LRRLO0000000      | AOEX000000000    | 60.3 | 2.82          | 60.3 - 60.3 | 0.0511   | 53.34            |
| LRRLO0000000      | CCSD010000000    | 92.2 | 1.84          | 92.2 - 92.2 | 0.0097   | 96.48            |
| LRRLO0000000      | LDUF010000000    | 92.9 | 1.74          | 92.9 - 92.9 | 0.009    | 96.68            |
| LRRLO0000000      | AGVW000000000    | 21.7 | 2.35          | 21.7 - 21.7 | 0.2026   | 0                |
| LRRLO0000000      | AZHI000000000    | 44.1 | 2.55          | 44.1 - 44.1 | 0.0869   | 6.84             |
| LRRLO0000000      | LRRK000000000    | 21.7 | 2.35          | 21.7 - 21.7 | 0.2026   | 0                |
|                   |                  |      |               |             |          |                  |
| <b>Group B1-3</b> |                  |      |               |             |          |                  |
| Query genome      | Reference genome | DDH  | Model C.I.    | Bootstrap   | Distance | Prob. DDH >= 70% |
| AOEX000000000     | AVAE000000000    | 42.7 | [40.1 - 45.2] | 42.7 - 42.7 | 0.091    | 5.07             |
| AOEX000000000     | AFAQ000000000    | 21.3 | [19.1 - 23.7] | 21.3 - 21.3 | 0.2059   | 0                |
| AOEX000000000     | CAVJ000000000    | 43.3 | [40.8 - 45.9] | 43.3 - 43.3 | 0.089    | 5.84             |
| AOEX000000000     | AJVB000000000    | 21.8 | [19.6 - 24.3] | 21.8 - 21.9 | 0.2008   | 0                |
| AOEX000000000     | AJFC000000000    | 60.6 | [57.8 - 63.4] | 60.6 - 60.6 | 0.0505   | 54.46            |
| AOEX000000000     | JPJJ010000000    | 21.6 | [19.3 - 24.0] | 21.6 - 21.6 | 0.2035   | 0                |
| AOEX000000000     | JTIZ010000000    | 21.4 | [19.1 - 23.8] | 21.4 - 21.4 | 0.2054   | 0                |
| AOEX000000000     | NZ_CP011341.1    | 43.5 | [41 - 46%]    | 43.5 - 43.5 | 0.0886   | 6.05             |
| AOEX000000000     | LPZN000000000    | 21.4 | [19.1 - 23.8] | 21.4 - 21.4 | 0.2052   | 0                |
| AOEX000000000     | NC_023150        | 21.2 | [19 - 23.6%]  | 21.2 - 21.2 | 0.2071   | 0                |
| AOEX000000000     | AHBW000000000    | 21.4 | [19.1 - 23.8] | 21.4 - 21.4 | 0.2052   | 0                |
| AOEX000000000     | LRRIO000000000   | 21.4 | [19.1 - 23.8] | 21.4 - 21.4 | 0.2052   | 0                |
| AOEX000000000     | LRRH000000000    | 22.2 | [20 - 24.7%]  | 22.2 - 22.2 | 0.1973   | 0                |
| AOEX000000000     | ANGC000000000    | 59.6 | [56.8 - 62.4] | 59.6 - 59.6 | 0.0523   | 51.08            |
| AOEX000000000     | LRRLO000000000   | 60.3 | [57.5 - 63.1] | 60.3 - 60.3 | 0.0511   | 53.34            |
| AOEX000000000     | CCSD010000000    | 60   | [57.2 - 62.8] | 60 - 60%    | 0.0516   | 52.39            |
| AOEX000000000     | LDUF010000000    | 60.5 | [57.6 - 63.2] | 60.5 - 60.5 | 0.0508   | 53.87            |
| AOEX000000000     | AGVW000000000    | 21.5 | [19.2 - 23.9] | 21.4 - 21.5 | 0.2046   | 0                |
| AOEX000000000     | AZHI000000000    | 42.9 | [40.4 - 45.5] | 42.9 - 42.9 | 0.0902   | 5.37             |
| AOEX000000000     | LRRK000000000    | 21.4 | [19.2 - 23.9] | 21.4 - 21.4 | 0.2049   | 0                |
|                   |                  |      |               |             |          |                  |
| <b>Group B-4</b>  |                  |      |               |             |          |                  |
| Query genome      | Reference genome | DDH  | Model C.I.    | Bootstrap   | Distance | Prob. DDH >= 70% |
| LRRH000000000     | AVAE000000000    | 22.9 | 2.37          | 22.9 - 22.9 | 0.1915   | 0                |
| LRRH000000000     | AFAQ000000000    | 22   | 2.35          | 22 - 22%    | 0.1996   | 0                |
| LRRH000000000     | CAVJ000000000    | 22.9 | 2.37          | 22.9 - 22.9 | 0.1915   | 0                |
| LRRH000000000     | AJVB000000000    | 22.6 | 2.36          | 22.5 - 22.6 | 0.1943   | 0                |
| LRRH000000000     | AJFC000000000    | 22.7 | 2.37          | 22.7 - 22.7 | 0.1928   | 0                |
| LRRH000000000     | JPJJ010000000    | 22.2 | 2.36          | 22.2 - 22.2 | 0.1978   | 0                |
| LRRH000000000     | JTIZ010000000    | 22.2 | 2.36          | 22.2 - 22.2 | 0.1976   | 0                |
| LRRH000000000     | NZ_CP011341.1    | 22.7 | 2.37          | 22.7 - 22.7 | 0.1932   | 0                |
| LRRH000000000     | LPZN000000000    | 22   | 2.35          | 22 - 22%    | 0.1993   | 0                |
| LRRH000000000     | NC_023150        | 21.9 | 2.35          | 21.9 - 21.9 | 0.2007   | 0                |
| LRRH000000000     | AHBW000000000    | 22   | 2.35          | 22 - 22%    | 0.1995   | 0                |
| LRRH000000000     | LRRIO000000000   | 21.9 | 2.35          | 21.9 - 21.9 | 0.1999   | 0                |
| LRRH000000000     | ANGC000000000    | 22.7 | 2.37          | 22.7 - 22.7 | 0.1933   | 0                |
| LRRH000000000     | AOEX000000000    | 22.2 | 2.36          | 22.2 - 22.2 | 0.1973   | 0                |
| LRRH000000000     | LRRLO000000000   | 22.6 | 2.36          | 22.6 - 22.6 | 0.1936   | 0                |
| LRRH000000000     | CCSD010000000    | 22.6 | 2.37          | 22.6 - 22.7 | 0.1934   | 0                |
| LRRH000000000     | LDUF010000000    | 22.6 | 2.36          | 22.6 - 22.6 | 0.1939   | 0                |

|                    |                  |      |            |             |          |                  |
|--------------------|------------------|------|------------|-------------|----------|------------------|
| LRRH00000000       | AGVW00000000     | 22.4 | 2.36       | 22.4 - 22.4 | 0.1959   | 0                |
| LRRH00000000       | AZHI00000000     | 23   | 2.37       | 23 - 23%    | 0.1903   | 0                |
| LRRH00000000       | LRRK00000000     | 22   | 2.35       | 22 - 22%    | 0.1993   | 0                |
|                    |                  |      |            |             |          |                  |
| <b>Group B2-5</b>  |                  |      |            |             |          |                  |
| Query genome       | Reference genome | DDH  | Model C.I. | Bootstrap   | Distance | Prob. DDH >= 70% |
| LPZN00000000       | AVAE00000000     | 21.8 | 2.35       | 21.8 - 21.8 | 0.201    | 0                |
| LPZN00000000       | AFAQ00000000     | 41.9 | 2.53       | 41.9 - 41.9 | 0.0932   | 4.3              |
| LPZN00000000       | CAVJ00000000     | 21.8 | 2.35       | 21.8 - 21.8 | 0.2008   | 0                |
| LPZN00000000       | AJVB00000000     | 85.7 | 2.49       | 85.7 - 85.7 | 0.0168   | 94.07            |
| LPZN00000000       | AJFC00000000     | 21.6 | 2.34       | 21.6 - 21.6 | 0.2033   | 0                |
| LPZN00000000       | JPJJ01000000     | 42.5 | 2.53       | 42.5 - 42.5 | 0.0914   | 4.91             |
| LPZN00000000       | JTIZ01000000     | 42   | 2.53       | 41.9 - 42%  | 0.0931   | 4.33             |
| LPZN00000000       | NZ_CP011341.1    | 21.4 | 2.34       | 21.4 - 21.4 | 0.2055   | 0                |
| LPZN00000000       | NC_023150        | 42.2 | 2.53       | 42.2 - 42.2 | 0.0923   | 4.62             |
| LPZN00000000       | AHBW00000000     | 43   | 2.54       | 43 - 43%    | 0.09     | 5.44             |
| LPZN00000000       | LRRIO00000000    | 43   | 2.54       | 43 - 43%    | 0.0899   | 5.5              |
| LPZN00000000       | LRRH00000000     | 22   | 2.35       | 22 - 22%    | 0.1993   | 0                |
| LPZN00000000       | ANGC00000000     | 21.6 | 2.34       | 21.6 - 21.6 | 0.2033   | 0                |
| LPZN00000000       | AOEX00000000     | 21.4 | 2.34       | 21.4 - 21.4 | 0.2052   | 0                |
| LPZN00000000       | LRRLO00000000    | 21.4 | 2.34       | 21.4 - 21.4 | 0.2056   | 0                |
| LPZN00000000       | CCSD01000000     | 21.6 | 2.34       | 21.6 - 21.6 | 0.2035   | 0                |
| LPZN00000000       | LDUF01000000     | 21.7 | 2.35       | 21.7 - 21.7 | 0.2019   | 0                |
| LPZN00000000       | AGVW00000000     | 41.8 | 2.52       | 41.8 - 41.8 | 0.0936   | 4.19             |
| LPZN00000000       | AZHI00000000     | 21.8 | 2.35       | 21.8 - 21.8 | 0.2016   | 0                |
| LPZN00000000       | LRRK00000000     | 41.7 | 2.52       | 41.7 - 41.7 | 0.0938   | 4.12             |
|                    |                  |      |            |             |          |                  |
| <b>Group B2-6a</b> |                  |      |            |             |          |                  |
| Query genome       | Reference genome | DDH  | Model C.I. | Bootstrap   | Distance | Prob. DDH >= 70% |
| LRRK00000000       | AVAE00000000     | 21.8 | 2.35       | 21.8 - 21.8 | 0.2013   | 0                |
| LRRK00000000       | AFAQ00000000     | 57.1 | 2.76       | 57.1 - 57.1 | 0.0568   | 42.4             |
| LRRK00000000       | CAVJ00000000     | 21.8 | 2.35       | 21.8 - 21.8 | 0.2009   | 0                |
| LRRK00000000       | AJVB00000000     | 41.6 | 2.52       | 41.6 - 41.6 | 0.0944   | 3.95             |
| LRRK00000000       | AJFC00000000     | 21.8 | 2.35       | 21.8 - 21.8 | 0.2009   | 0                |
| LRRK00000000       | JPJJ01000000     | 59.3 | 2.8        | 59.3 - 59.3 | 0.0528   | 50.04            |
| LRRK00000000       | JTIZ01000000     | 59.1 | 2.79       | 59.1 - 59.1 | 0.0532   | 49.24            |
| LRRK00000000       | NZ_CP011341.1    | 21.6 | 2.35       | 21.6 - 21.7 | 0.2027   | 0                |
| LRRK00000000       | LPZN00000000     | 41.7 | 2.52       | 41.7 - 41.7 | 0.0938   | 4.12             |
| LRRK00000000       | NC_023150        | 59.2 | 2.8        | 59.2 - 59.2 | 0.0531   | 49.54            |
| LRRK00000000       | AHBW00000000     | 58.9 | 2.79       | 58.9 - 58.9 | 0.0535   | 48.76            |
| LRRK00000000       | LRRIO00000000    | 58.7 | 2.79       | 58.7 - 58.7 | 0.0539   | 47.89            |
| LRRK00000000       | LRRH00000000     | 22   | 2.35       | 22 - 22%    | 0.1993   | 0                |
| LRRK00000000       | ANGC00000000     | 21.6 | 2.35       | 21.6 - 21.6 | 0.2027   | 0                |
| LRRK00000000       | AOEX00000000     | 21.4 | 2.34       | 21.4 - 21.4 | 0.2049   | 0                |
| LRRK00000000       | LRRLO00000000    | 21.7 | 2.35       | 21.7 - 21.7 | 0.2026   | 0                |
| LRRK00000000       | CCSD01000000     | 21.6 | 2.35       | 21.6 - 21.6 | 0.2029   | 0                |
| LRRK00000000       | LDUF01000000     | 21.5 | 2.34       | 21.5 - 21.5 | 0.2043   | 0                |
| LRRK00000000       | AGVW00000000     | 62.5 | 2.85       | 62.5 - 62.6 | 0.0473   | 60.44            |
| LRRK00000000       | AZHI00000000     | 21.8 | 2.35       | 21.8 - 21.8 | 0.2013   | 0                |
|                    |                  |      |            |             |          |                  |



| Group B2-6b  |                  |      |            |             |          |                  |
|--------------|------------------|------|------------|-------------|----------|------------------|
| Query genome | Reference genome | DDH  | Model C.I. | Bootstrap   | Distance | Prob. DDH >= 70% |
| AGVW00000000 | LPZN00000000     | 41.8 | 2.52       | 41.8 - 41.8 | 0.0936   | 4.19             |
| AGVW00000000 | LRR100000000     | 59.9 | 2.81       | 59.9 - 59.9 | 0.0517   | 52.1             |
| AGVW00000000 | LRRH00000000     | 22.4 | 2.36       | 22.4 - 22.4 | 0.1959   | 0                |
| AGVW00000000 | LRRLO0000000     | 21.7 | 2.35       | 21.7 - 21.7 | 0.2026   | 0                |
| AGVW00000000 | LRRK00000000     | 62.5 | 2.85       | 62.5 - 62.6 | 0.0473   | 60.44            |
| AGVW00000000 | AVAE00000000     | 21.7 | 2.950495   | 21.7 - 21.7 | 0.2018   | 0                |
| AGVW00000000 | CAVJ000000000    | 21.7 | 2.942169   | 21.7 - 21.7 | 0.2018   | 0                |
| AGVW00000000 | NZ_CP011341.1    | 21.6 | 2.966245   | 21.6 - 21.6 | 0.2032   | 0                |
| AGVW00000000 | AZHI000000000    | 21.7 | 2.943735   | 21.7 - 21.7 | 0.202    | 0                |
| AGVW00000000 | AJFC000000000    | 21.8 | 2.935339   | 21.8 - 21.8 | 0.2013   | 0                |
| AGVW00000000 | CCSD01000000     | 21.7 | 2.942023   | 21.7 - 21.7 | 0.2021   | 0                |
| AGVW00000000 | LDUF01000000     | 21.7 | 2.951113   | 21.7 - 21.7 | 0.2026   | 0                |
| AGVW00000000 | ANGC000000000    | 21.7 | 2.949395   | 21.7 - 21.7 | 0.2021   | 0                |
| AGVW00000000 | AOEX000000000    | 21.5 | 2.942441   | 21.4 - 21.5 | 0.2046   | 0                |
| AGVW00000000 | AJVB000000000    | 42   | 3.102589   | 42 - 42%    | 0.0931   | 4.34             |
| AGVW00000000 | JTIZ01000000     | 59.3 | 3.199612   | 59.3 - 59.3 | 0.0529   | 49.9             |
| AGVW00000000 | AFAQ000000000    | 58.7 | 3.005453   | 58.7 - 58.7 | 0.0539   | 47.91            |
| AGVW00000000 | JPJJ01000000     | 61.2 | 3.219722   | 61.2 - 61.2 | 0.0495   | 56.38            |
| AGVW00000000 | NC_023150        | 60.8 | 3.294971   | 60.8 - 60.8 | 0.0503   | 54.86            |
| AGVW00000000 | AHBW000000000    | 60.2 | 3.224831   | 60.2 - 60.2 | 0.0513   | 52.88            |
|              |                  |      |            |             |          |                  |
| Group B2-7   |                  |      |            |             |          |                  |
| Query genome | Reference genome | DDH  | Model C.I. | Bootstrap   | Distance | Prob. DDH >= 70% |
| LRR100000000 | AVAE000000000    | 22   | 2.35       | 22 - 22%    | 0.199    | 0                |
| LRR100000000 | AFAQ000000000    | 84.2 | 2.59       | 84.1 - 84.2 | 0.0186   | 93.29            |
| LRR100000000 | CAVJ000000000    | 22.1 | 2.35       | 22.1 - 22.1 | 0.1983   | 0                |
| LRR100000000 | AJVB000000000    | 42.8 | 2.54       | 42.8 - 42.8 | 0.0905   | 5.25             |
| LRR100000000 | AJFC000000000    | 21.8 | 2.35       | 21.8 - 21.8 | 0.2017   | 0                |
| LRR100000000 | JPJJ01000000     | 86.9 | 2.41       | 86.8 - 86.9 | 0.0156   | 94.59            |
| LRR100000000 | JTIZ01000000     | 87.4 | 2.36       | 87.4 - 87.4 | 0.015    | 94.82            |
| LRR100000000 | NZ_CP011341.1    | 21.5 | 2.34       | 21.5 - 21.5 | 0.2041   | 0                |
| LRR100000000 | LPZN000000000    | 43   | 2.54       | 43 - 43%    | 0.0899   | 5.5              |
| LRR100000000 | NC_023150        | 86.4 | 2.44       | 86.4 - 86.4 | 0.0161   | 94.38            |
| LRR100000000 | AHBW000000000    | 87.8 | 2.32       | 87.8 - 87.8 | 0.0145   | 94.99            |
| LRR100000000 | LRRH000000000    | 21.9 | 2.35       | 21.9 - 21.9 | 0.1999   | 0                |
| LRR100000000 | ANGC000000000    | 21.7 | 2.35       | 21.7 - 21.7 | 0.2025   | 0                |
| LRR100000000 | AOEX000000000    | 21.4 | 2.34       | 21.4 - 21.4 | 0.2052   | 0                |
| LRR100000000 | LRRLO0000000     | 21.5 | 2.34       | 21.5 - 21.5 | 0.2037   | 0                |
| LRR100000000 | CCSD01000000     | 21.7 | 2.35       | 21.7 - 21.7 | 0.2018   | 0                |
| LRR100000000 | LDUF01000000     | 21.8 | 2.35       | 21.8 - 21.8 | 0.2016   | 0                |
| LRR100000000 | AGVW000000000    | 59.9 | 2.81       | 59.9 - 59.9 | 0.0517   | 52.1             |
| LRR100000000 | AZHI000000000    | 22   | 2.35       | 22 - 22%    | 0.1992   | 0                |
| LRR100000000 | LRRK000000000    | 58.7 | 2.79       | 58.7 - 58.7 | 0.0539   | 47.89            |
|              |                  |      |            |             |          |                  |
| Group C-1    |                  |      |            |             |          |                  |
| Query genome | Reference genome | DDH  | Model C.I. | Bootstrap   | Distance | Prob. DDH >= 70% |
| NC_008268    | LRRG000000000    | 60.3 | 2.82       | 60.3 - 60.3 | 0.0511   | 53.41            |
| NC_008268    | AKKP000000000    | 90.3 | 3.284781   | 90.3 - 90.3 | 0.0118   | 95.89            |

|                  |                  |      |            |              |          |                  |
|------------------|------------------|------|------------|--------------|----------|------------------|
| NC_008268        | AJLQ00000000     | 93.9 | 2.847251   | 93.9 - 94%   | 0.0078   | 96.95            |
| NC_008268        | NC_008268        | 100  | Inf        | 100 - 100%   | 0        | 98.3             |
| NC_008268        | AJJH00000000     | 60.4 | 3.143948   | 60.4 - 60.4% | 0.0509   | 53.65            |
| NC_008268        | AJYC00000000     | 59.8 | 3.227206   | 59.8 - 59.8% | 0.0519   | 51.78            |
| NC_008268        | ANIU00000000     | 60.1 | 3.16812    | 60.1 - 60.1% | 0.0514   | 52.82            |
| NC_008268        | CP008947.1       | 58.7 | 3.333428   | 58.7 - 58.7% | 0.0538   | 48.09            |
| NC_008268        | BAWF01000000     | 58.5 | 3.135921   | 58.5 - 58.5% | 0.0543   | 47.12            |
| NC_008268        | AGVD00000000     | 60   | 3.280012   | 60 - 60%     | 0.0515   | 52.48            |
| NC_008268        | NC_012522        | 42   | 3.123612   | 42 - 42%     | 0.0929   | 4.42             |
|                  |                  |      |            |              |          |                  |
| <b>Group C-2</b> |                  |      |            |              |          |                  |
| Query genome     | Reference genome | DDH  | Model C.I. | Bootstrap    | Distance | Prob. DDH >= 70% |
| LRRG00000000     | AKKP00000000     | 60.1 | 2.81       | 60.1 - 60.1% | 0.0515   | 52.57            |
| LRRG00000000     | AJLQ00000000     | 59.5 | 2.8        | 59.4 - 59.5% | 0.0526   | 50.5             |
| LRRG00000000     | AJJH00000000     | 81.2 | 2.74       | 81.2 - 81.2% | 0.0219   | 91.47            |
| LRRG00000000     | NC_008268        | 60.3 | 2.82       | 60.3 - 60.3% | 0.0511   | 53.41            |
| LRRG00000000     | NC_012522        | 42.8 | 2.53       | 42.8 - 42.8% | 0.0907   | 5.18             |
| LRRG00000000     | AGVD00000000     | 70.6 | 2.93       | 70.6 - 70.6% | 0.0352   | 79.46            |
| LRRG00000000     | AJYC00000000     | 85.2 | 2.53       | 85.2 - 85.2% | 0.0174   | 93.83            |
| LRRG00000000     | CP008947.1       | 59.2 | 2.8        | 59.2 - 59.2% | 0.053    | 49.6             |
| LRRG00000000     | ANIU00000000     | 97.1 | 0.96       | 97.1 - 97.1% | 0.0042   | 97.67            |
| LRRG00000000     | BAWF01000000     | 58.2 | 2.78       | 58.2 - 58.2% | 0.0549   | 46.13            |
|                  |                  |      |            |              |          |                  |
| <b>Group C-3</b> |                  |      |            |              |          |                  |
| Query genome     | Reference genome | DDH  | Model C.I. | Bootstrap    | Distance | Prob. DDH >= 70% |
| BAWF01000000     | AKKP00000000     | 58.2 | 2.78       | 58.2 - 58.2% | 0.0548   | 46.17            |
| BAWF01000000     | AJLQ00000000     | 57.1 | 2.76       | 57.1 - 57.1% | 0.0569   | 42.26            |
| BAWF01000000     | AJJH00000000     | 57.4 | 2.76       | 57.4 - 57.4% | 0.0563   | 43.39            |
| BAWF01000000     | NC_008268        | 58.5 | 2.78       | 58.5 - 58.5% | 0.0543   | 47.12            |
| BAWF01000000     | NC_012522        | 43.5 | 2.54       | 43.5 - 43.5% | 0.0884   | 6.12             |
| BAWF01000000     | AGVD00000000     | 58.5 | 2.78       | 58.5 - 58.6% | 0.0542   | 47.41            |
| BAWF01000000     | AJYC00000000     | 57.8 | 2.77       | 57.8 - 57.8% | 0.0555   | 44.83            |
| BAWF01000000     | CP008947.1       | 91.6 | 1.92       | 91.6 - 91.6% | 0.0104   | 96.31            |
| BAWF01000000     | LRRG00000000     | 58.2 | 2.78       | 58.2 - 58.2% | 0.0549   | 46.13            |
| BAWF01000000     | ANIU00000000     | 57.5 | 2.76       | 57.5 - 57.5% | 0.0562   | 43.65            |
|                  |                  |      |            |              |          |                  |
| <b>Group C-4</b> |                  |      |            |              |          |                  |
| Query genome     | Reference genome | DDH  | Model C.I. | Bootstrap    | Distance | Prob. DDH >= 70% |
| AGVD00000000     | AKKP00000000     | 59.8 | 2.81       | 59.8 - 59.8% | 0.052    | 51.64            |
| AGVD00000000     | AJLQ00000000     | 59.2 | 2.8        | 59.2 - 59.2% | 0.053    | 49.77            |
| AGVD00000000     | AJJH00000000     | 69.2 | 2.92       | 69.2 - 69.2% | 0.0373   | 76.75            |
| AGVD00000000     | NC_008268        | 60   | 2.81       | 60 - 60%     | 0.0515   | 52.48            |
| AGVD00000000     | NC_012522        | 43.2 | 2.54       | 43.2 - 43.2% | 0.0894   | 5.71             |
| AGVD00000000     | AJYC00000000     | 69.8 | 2.92       | 69.8 - 69.8% | 0.0363   | 78.03            |
| AGVD00000000     | CP008947.1       | 59.1 | 2.8        | 59.1 - 59.2% | 0.0531   | 49.47            |
| AGVD00000000     | LRRG00000000     | 70.6 | 2.93       | 70.6 - 70.6% | 0.0352   | 79.46            |
| AGVD00000000     | ANIU00000000     | 70   | 2.92       | 70 - 70%     | 0.0362   | 78.27            |
| AGVD00000000     | BAWF01000000     | 58.5 | 2.78       | 58.5 - 58.6% | 0.0542   | 47.41            |
|                  |                  |      |            |              |          |                  |
| <b>Group C-5</b> |                  |      |            |              |          |                  |



|                   |                  |       |              |             |          |                  |
|-------------------|------------------|-------|--------------|-------------|----------|------------------|
| NC_022115         | AGCF00000000     | 88.3  | 2.889517     | 88.3 - 88.3 | 0.014    | 95.18            |
| NC_022115         | AUZK00000000     | 87.6  | 2.25441      | 87.6 - 87.6 | 0.0147   | 94.92            |
| NC_022115         | ASKF01000000     | 89.1  | 2.133519     | 89.1 - 89.1 | 0.0131   | 95.48            |
| NC_022115         | NZ_CP011295.1    | 89    | 1.339991     | 89 - 89%    | 0.0132   | 95.45            |
| NC_022115         | JOIM01000000     | 100   | 0.089949     | 99.9 - 99.9 | 0.0003   | 98.26            |
| NC_022115         | ASJJ00000000     | 100   | 1.05517      | 99.6 - 99.6 | 0.0008   | 98.19            |
| NC_022115         | JYOP01000000     | 24.1  | [21.8 - 26.5 | 24.1 - 24.1 | 0.1815   | 0.01             |
| NC_022115         | CEDU01000000     | 24    | [21.7 - 26.5 | 24 - 24%    | 0.1819   | 0                |
| NC_022115         | JNWS01000000     | 24.1  | [21.8 - 26.5 | 24.1 - 24.1 | 0.1814   | 0.01             |
|                   |                  |       |              |             |          |                  |
| <b>Group D-3</b>  |                  |       |              |             |          |                  |
| Query genome      | Reference genome | DDH   | Model C.I.   | Bootstrap   | Distance | Prob. DDH >= 70% |
| JNWS01000000      | JYOP01000000     | 88.8  | 2.862449     | 88.8 - 88.8 | 0.0134   | 95.37            |
| JNWS01000000      | CEDU01000000     | 83.4  | 2.723753     | 83.4 - 83.4 | 0.0194   | 92.85            |
|                   |                  |       |              |             |          |                  |
| <b>Group E1-1</b> |                  |       |              |             |          |                  |
| Query genome      | Reference genome | DDH   | Model C.I.   | Bootstrap   | Distance | Prob. DDH >= 70% |
| JOKB01000000      | ARTN00000000     | 56.8  | 3.348659     | 56.8 - 56.8 | 0.0575   | 41.15            |
| JOKB01000000      | ARND00000000     | -9999 |              |             | -9999    |                  |
| JOKB01000000      | JMEX01000000     | 57    | 3.327823     | 57 - 57.1%  | 0.0569   | 42.17            |
| JOKB01000000      | JMEW01000000     | 59.3  | 3.348787     | 59.3 - 59.3 | 0.0528   | 50.12            |
| JOKB01000000      | JMFF01000000     | 57.3  | 3.348982     | 57.3 - 57.3 | 0.0565   | 43.01            |
| JOKB01000000      | JMFE01000000     | 57.5  | 3.332635     | 57.5 - 57.5 | 0.0562   | 43.62            |
| JOKB01000000      | JMEV01000000     | 22    | 2.899647     | 22 - 22%    | 0.1992   | 0                |
| JOKB01000000      | BAOX01000000     | 21.3  | 2.821507     | 21.3 - 21.3 | 0.2064   | 0                |
| JOKB01000000      | NZ_CP010797.1    | 20.2  | 2.875993     | 20.2 - 20.2 | 0.2175   | 0                |
| JOKB01000000      | JMFC01000000     | 22.5  | 2.907818     | 22.5 - 22.5 | 0.1946   | 0                |
| JOKB01000000      | JMFD01000000     | 20.6  | 2.840616     | 20.6 - 20.6 | 0.2134   | 0                |
| JOKB01000000      | JMFA01000000     | 21.3  | 2.868488     | 21.3 - 21.3 | 0.2062   | 0                |
| JOKB01000000      | JMEZ01000000     | 20.9  | 2.863237     | 20.9 - 20.9 | 0.2103   | 0                |
| JOKB01000000      | JMEM01000000     | 22.1  | 2.878388     | 22.1 - 22.1 | 0.1987   | 0                |
| JOKB01000000      | JZIS01000000     | 20.6  | 2.865046     | 20.6 - 20.6 | 0.213    | 0                |
| JOKB01000000      | AXVF00000000     | 20.6  | 2.878426     | 20.6 - 20.6 | 0.2132   | 0                |
| JOKB01000000      | LFDS01000000     | 20.4  | 2.869638     | 20.4 - 20.4 | 0.2153   | 0                |
| JOKB01000000      | JMEY01000000     | 23    | 2.894318     | 23 - 23%    | 0.1906   | 0                |
| JOKB01000000      | JMEU01000000     | 22.9  | 2.910638     | 22.9 - 22.9 | 0.1915   | 0                |
| JOKB01000000      | JMES01000000     | 20.5  | 2.859485     | 20.5 - 20.5 | 0.2144   | 0                |
| JOKB01000000      | JMER01000000     | 20.6  | 2.857774     | 20.6 - 20.6 | 0.2129   | 0                |
| JOKB01000000      | JMET01000000     | 22.5  | 2.901807     | 22.5 - 22.5 | 0.195    | 0                |
| JOKB01000000      | JMEQ01000000     | 20.7  | 2.865869     | 20.7 - 20.7 | 0.2124   | 0                |
| JOKB01000000      | JMEP01000000     | 22.5  | 2.901084     | 22.5 - 22.5 | 0.1945   | 0                |
| JOKB01000000      | JMEO01000000     | 23.1  | 2.899508     | 23.1 - 23.1 | 0.1894   | 0                |
| JOKB01000000      | JMEN01000000     | 22.6  | 2.898779     | 22.6 - 22.6 | 0.1942   | 0                |
| JOKB01000000      | CAPS00000000     | 21.6  | 2.830852     | 21.6 - 21.6 | 0.2032   | 0                |
|                   |                  |       |              |             |          |                  |
| <b>Group E1-2</b> |                  |       |              |             |          |                  |
| Query genome      | Reference genome | DDH   | Model C.I.   | Bootstrap   | Distance | Prob. DDH >= 70% |
| ARTN00000000      | JOKB01000000     | 56.8  | 3.348659     | 56.8 - 56.8 | 0.0575   | 41.15            |
| ARTN00000000      | ARND00000000     | -9999 |              |             | -9999    |                  |
| ARTN00000000      | JMEX01000000     | 91.6  | 2.838378     | 91.6 - 91.6 | 0.0103   | 96.31            |



|                   |                  |       |            |              |          |                  |
|-------------------|------------------|-------|------------|--------------|----------|------------------|
| JMEV01000000      | JMEP01000000     | 29.2  | 3.061572   | 29.2 - 29.2% | 0.1465   | 0.08             |
| JMEV01000000      | JMEO01000000     | 29.1  | 3.03946    | 29.1 - 29.1% | 0.1474   | 0.07             |
| JMEV01000000      | JMEN01000000     | 29    | 3.035506   | 29 - 29%     | 0.1477   | 0.07             |
| JMEV01000000      | CAPS00000000     | 30.7  | 3.018599   | 30.7 - 30.7% | 0.1381   | 0.14             |
|                   |                  |       |            |              |          |                  |
| <b>Group E2-4</b> |                  |       |            |              |          |                  |
| Query genome      | Reference genome | DDH   | Model C.I. | Bootstrap    | Distance | Prob. DDH >= 70% |
| BAOX01000000      | JOKB01000000     | 21.3  | 2.821507   | 21.3 - 21.3% | 0.2064   | 0                |
| BAOX01000000      | ARTN00000000     | 20.9  | 2.826377   | 20.9 - 21%   | 0.2097   | 0                |
| BAOX01000000      | ARND00000000     | -9999 |            |              | -9999    |                  |
| BAOX01000000      | JMEX01000000     | 21.2  | 2.825755   | 21.2 - 21.3% | 0.2066   | 0                |
| BAOX01000000      | JMEW01000000     | 21.3  | 2.817231   | 21.3 - 21.3% | 0.2058   | 0                |
| BAOX01000000      | JMFF01000000     | 21    | 2.815155   | 21 - 21%     | 0.2092   | 0                |
| BAOX01000000      | JMFE01000000     | 21.4  | 2.825742   | 21.4 - 21.4% | 0.2054   | 0                |
| BAOX01000000      | JMEV01000000     | 46.5  | 3.124931   | 46.5 - 46.5% | 0.0803   | 10.83            |
| BAOX01000000      | NZ_CP010797.1    | 45    | 3.200654   | 45 - 45%     | 0.0844   | 8.17             |
| BAOX01000000      | JMFC01000000     | 45    | 3.157344   | 45 - 45%     | 0.0842   | 8.25             |
| BAOX01000000      | JMFD01000000     | 31.8  | 3.033918   | 31.8 - 31.8% | 0.1327   | 0.22             |
| BAOX01000000      | JMFA01000000     | 32.1  | 3.027924   | 32.1 - 32.1% | 0.1315   | 0.24             |
| BAOX01000000      | JMEZ01000000     | 31.9  | 3.02665    | 31.9 - 31.9% | 0.132    | 0.23             |
| BAOX01000000      | JMEM01000000     | 31.9  | 3.02298    | 31.9 - 31.9% | 0.1321   | 0.23             |
| BAOX01000000      | JZIS01000000     | 28.7  | 3.010007   | 28.7 - 28.7% | 0.1496   | 0.06             |
| BAOX01000000      | AXVF00000000     | 28.5  | 3.006439   | 28.5 - 28.5% | 0.1505   | 0.06             |
| BAOX01000000      | LFDS01000000     | 28.4  | 3.008569   | 28.4 - 28.4% | 0.1511   | 0.05             |
| BAOX01000000      | JMEY01000000     | 28    | 3.006953   | 28 - 28%     | 0.1539   | 0.04             |
| BAOX01000000      | JMEU01000000     | 28    | 3.005871   | 28 - 28%     | 0.1538   | 0.04             |
| BAOX01000000      | JMES01000000     | 28.7  | 3.007533   | 28.7 - 28.7% | 0.1497   | 0.06             |
| BAOX01000000      | JMER01000000     | 28.6  | 3.00579    | 28.6 - 28.6% | 0.15     | 0.06             |
| BAOX01000000      | JMET01000000     | 28.1  | 3.005423   | 28.1 - 28.1% | 0.1529   | 0.05             |
| BAOX01000000      | JMEQ01000000     | 28.2  | 3.005574   | 28.2 - 28.2% | 0.1526   | 0.05             |
| BAOX01000000      | JMEP01000000     | 28.1  | 3.005423   | 28.1 - 28.1% | 0.153    | 0.05             |
| BAOX01000000      | JMEO01000000     | 28.1  | 3.005776   | 28.1 - 28.1% | 0.1529   | 0.05             |
| BAOX01000000      | JMEN01000000     | 28    | 3.00574    | 28 - 28%     | 0.1539   | 0.04             |
| BAOX01000000      | CAPS00000000     | 31.1  | 3.007535   | 31.1 - 31.1% | 0.1361   | 0.17             |
|                   |                  |       |            |              |          |                  |
| <b>Group E2-5</b> |                  |       |            |              |          |                  |
| Query genome      | Reference genome | DDH   | Model C.I. | Bootstrap    | Distance | Prob. DDH >= 70% |
| NZ_CP010797.1     | JOKB01000000     | 20.2  | 2.875993   | 20.2 - 20.2% | 0.2175   | 0                |
| NZ_CP010797.1     | ARTN00000000     | 20.1  | 2.903683   | 20.1 - 20.1% | 0.2183   | 0                |
| NZ_CP010797.1     | ARND00000000     | -9999 |            |              | -9999    |                  |
| NZ_CP010797.1     | JMEX01000000     | 20.2  | 2.892591   | 20.2 - 20.2% | 0.2179   | 0                |
| NZ_CP010797.1     | JMEW01000000     | 20.3  | 2.886779   | 20.3 - 20.3% | 0.2168   | 0                |
| NZ_CP010797.1     | JMFF01000000     | 20.2  | 2.886077   | 20.1 - 20.2% | 0.2181   | 0                |
| NZ_CP010797.1     | JMFE01000000     | 20.2  | 2.885661   | 20.2 - 20.2% | 0.2173   | 0                |
| NZ_CP010797.1     | JMEV01000000     | 42.4  | 3.220153   | 42.4 - 42.4% | 0.0917   | 4.82             |
| NZ_CP010797.1     | BAOX01000000     | 45    | 3.200654   | 45 - 45%     | 0.0844   | 8.17             |
| NZ_CP010797.1     | JMFC01000000     | 87.2  | 2.909668   | 87.2 - 87.2% | 0.0152   | 94.75            |
| NZ_CP010797.1     | JMFD01000000     | 31.6  | 3.177853   | 31.6 - 31.6% | 0.1339   | 0.2              |
| NZ_CP010797.1     | JMFA01000000     | 31.5  | 3.121973   | 31.4 - 31.5% | 0.1345   | 0.19             |
| NZ_CP010797.1     | JMEZ01000000     | 31.5  | 3.148921   | 31.5 - 31.5% | 0.1343   | 0.19             |

|                   |                  |       |            |             |          |                  |
|-------------------|------------------|-------|------------|-------------|----------|------------------|
| NZ_CP010797.1     | JMEM01000000     | 31.4  | 3.133552   | 31.4 - 31.4 | 0.1346   | 0.19             |
| NZ_CP010797.1     | JZIS01000000     | 27.5  | 3.077759   | 27.5 - 27.5 | 0.157    | 0.03             |
| NZ_CP010797.1     | AXVF00000000     | 27.4  | 3.062715   | 27.4 - 27.4 | 0.1576   | 0.03             |
| NZ_CP010797.1     | LFDS01000000     | 27.4  | 3.083969   | 27.4 - 27.4 | 0.1576   | 0.03             |
| NZ_CP010797.1     | JMEY01000000     | 27.4  | 3.026672   | 27.4 - 27.4 | 0.1576   | 0.03             |
| NZ_CP010797.1     | JMEU01000000     | 27.2  | 3.027126   | 27.2 - 27.2 | 0.1591   | 0.03             |
| NZ_CP010797.1     | JMES01000000     | 27.3  | 3.041463   | 27.3 - 27.3 | 0.1579   | 0.03             |
| NZ_CP010797.1     | JMER01000000     | 27.3  | 3.032581   | 27.3 - 27.3 | 0.158    | 0.03             |
| NZ_CP010797.1     | JMET01000000     | 27.4  | 3.057615   | 27.4 - 27.4 | 0.1573   | 0.03             |
| NZ_CP010797.1     | JMEQ01000000     | 27.3  | 3.057156   | 27.3 - 27.3 | 0.1582   | 0.03             |
| NZ_CP010797.1     | JMEP01000000     | 27.4  | 3.056768   | 27.4 - 27.4 | 0.1575   | 0.03             |
| NZ_CP010797.1     | JMEO01000000     | 27.2  | 3.031559   | 27.2 - 27.2 | 0.1586   | 0.03             |
| NZ_CP010797.1     | JMEN01000000     | 27.3  | 3.030267   | 27.3 - 27.3 | 0.1584   | 0.03             |
| NZ_CP010797.1     | CAPS00000000     | 29.6  | 3.022032   | 29.6 - 29.7 | 0.1441   | 0.09             |
|                   |                  |       |            |             |          |                  |
| <b>Group E2-6</b> |                  |       |            |             |          |                  |
| Query genome      | Reference genome | DDH   | Model C.I. | Bootstrap   | Distance | Prob. DDH >= 70% |
| JMFD01000000      | JOKB01000000     | 20.6  | 2.840616   | 20.6 - 20.6 | 0.2134   | 0                |
| JMFD01000000      | ARTN00000000     | 20.4  | 2.854134   | 20.4 - 20.4 | 0.2157   | 0                |
| JMFD01000000      | ARND00000000     | -9999 |            |             | -9999    |                  |
| JMFD01000000      | JMEX01000000     | 20.5  | 2.848266   | 20.5 - 20.5 | 0.2142   | 0                |
| JMFD01000000      | JMEW01000000     | 20.6  | 2.849756   | 20.6 - 20.6 | 0.2134   | 0                |
| JMFD01000000      | JMFF01000000     | 20.4  | 2.845946   | 20.4 - 20.4 | 0.2149   | 0                |
| JMFD01000000      | JMFE01000000     | 20.6  | 2.854172   | 20.6 - 20.6 | 0.2138   | 0                |
| JMFD01000000      | JMEV01000000     | 32.9  | 3.084305   | 32.9 - 32.9 | 0.1274   | 0.32             |
| JMFD01000000      | BAOX01000000     | 31.8  | 3.033918   | 31.8 - 31.8 | 0.1327   | 0.22             |
| JMFD01000000      | NZ_CP010797.1    | 31.6  | 3.177853   | 31.6 - 31.6 | 0.1339   | 0.2              |
| JMFD01000000      | JMFC01000000     | 31.5  | 3.132992   | 31.5 - 31.5 | 0.1342   | 0.19             |
| JMFD01000000      | JMFD01000000     | 100   | 0.002646   | 100 - 100%  | 0        | 98.3             |
| JMFD01000000      | JMFA01000000     | 87    | 3.114755   | 87 - 87%    | 0.0154   | 94.64            |
| JMFD01000000      | JMEZ01000000     | 69.6  | 3.294275   | 69.6 - 69.6 | 0.0367   | 77.55            |
| JMFD01000000      | JMEM01000000     | 68    | 3.345255   | 68 - 68%    | 0.039    | 74.38            |
| JMFD01000000      | JZIS01000000     | 28.1  | 3.056643   | 28.1 - 28.1 | 0.1534   | 0.04             |
| JMFD01000000      | AXVF00000000     | 28.1  | 3.050903   | 28.1 - 28.1 | 0.1531   | 0.05             |
| JMFD01000000      | LFDS01000000     | 28.3  | 3.081406   | 28.3 - 28.3 | 0.1522   | 0.05             |
| JMFD01000000      | JMEY01000000     | 28.5  | 3.041157   | 28.5 - 28.5 | 0.1507   | 0.05             |
| JMFD01000000      | JMEU01000000     | 28.1  | 3.032277   | 28.1 - 28.1 | 0.1533   | 0.04             |
| JMFD01000000      | JMES01000000     | 28.2  | 3.045261   | 28.2 - 28.2 | 0.1525   | 0.05             |
| JMFD01000000      | JMER01000000     | 28.1  | 3.034748   | 28.1 - 28.1 | 0.1531   | 0.05             |
| JMFD01000000      | JMET01000000     | 28.2  | 3.045535   | 28.2 - 28.2 | 0.1527   | 0.05             |
| JMFD01000000      | JMEQ01000000     | 28    | 3.043152   | 28 - 28%    | 0.1535   | 0.04             |
| JMFD01000000      | JMEP01000000     | 28.2  | 3.044245   | 28.2 - 28.2 | 0.1527   | 0.05             |
| JMFD01000000      | JMEO01000000     | 28    | 3.029697   | 28 - 28%    | 0.1538   | 0.04             |
| JMFD01000000      | JMEN01000000     | 28    | 3.027513   | 28 - 28%    | 0.1535   | 0.04             |
| JMFD01000000      | CAPS00000000     | 30.9  | 3.022337   | 30.9 - 30.9 | 0.1375   | 0.15             |
|                   |                  |       |            |             |          |                  |
| <b>Group E2-7</b> |                  |       |            |             |          |                  |
| Query genome      | Reference genome | DDH   | Model C.I. | Bootstrap   | Distance | Prob. DDH >= 70% |
| JMEN01000000      | JOKB01000000     | 22.6  | 2.898779   | 22.6 - 22.6 | 0.1942   | 0                |
| JMEN01000000      | JMEY01000000     | 80.8  | 3.204293   | 80.8 - 80.8 | 0.0225   | 91.16            |

|                   |                  |       |            |              |          |                  |
|-------------------|------------------|-------|------------|--------------|----------|------------------|
| JMEN01000000      | JMFD01000000     | 28    | 3.027513   | 28 - 28%     | 0.1535   | 0.04             |
| JMEN01000000      | JMEX01000000     | 23.1  | 2.906309   | 23.1 - 23.1% | 0.1896   | 0                |
| JMEN01000000      | JMEW01000000     | 22.5  | 2.893871   | 22.5 - 22.5% | 0.1946   | 0                |
| JMEN01000000      | JMEU01000000     | 80.5  | 2.969147   | 80.5 - 80.5% | 0.0227   | 90.98            |
| JMEN01000000      | JMES01000000     | 78.2  | 3.267375   | 78.2 - 78.2% | 0.0255   | 89.1             |
| JMEN01000000      | JMER01000000     | 79.3  | 3.320445   | 79.3 - 79.3% | 0.0242   | 90.03            |
| JMEN01000000      | JMFF01000000     | 22.2  | 2.889654   | 22.2 - 22.2% | 0.1977   | 0                |
| JMEN01000000      | JMFE01000000     | 22.6  | 2.898558   | 22.6 - 22.6% | 0.1937   | 0                |
| JMEN01000000      | JMFC01000000     | 28.2  | 3.04425    | 28.2 - 28.2% | 0.1523   | 0.05             |
| JMEN01000000      | JMFA01000000     | 28.8  | 3.051789   | 28.8 - 28.8% | 0.1488   | 0.06             |
| JMEN01000000      | JMEZ01000000     | 28.5  | 3.02761    | 28.5 - 28.5% | 0.1508   | 0.05             |
| JMEN01000000      | JMEV01000000     | 29    | 3.035506   | 29 - 29%     | 0.1477   | 0.07             |
| JMEN01000000      | JMET01000000     | 80.7  | 2.688965   | 80.7 - 80.7% | 0.0225   | 91.12            |
| JMEN01000000      | JMEQ01000000     | 81.4  | 3.111312   | 81.4 - 81.4% | 0.0218   | 91.58            |
| JMEN01000000      | JMEP01000000     | 80.7  | 2.692911   | 80.7 - 80.7% | 0.0225   | 91.13            |
| JMEN01000000      | JMEO01000000     | 82.4  | 2.724175   | 82.4 - 82.4% | 0.0206   | 92.26            |
| JMEN01000000      | JMEM01000000     | 29.4  | 3.048811   | 29.4 - 29.4% | 0.1453   | 0.08             |
| JMEN01000000      | LFDS01000000     | 79.1  | 3.080221   | 79.1 - 79.1% | 0.0244   | 89.9             |
| JMEN01000000      | ARTN00000000     | 20.3  | 2.869777   | 20.3 - 20.4% | 0.216    | 0                |
| JMEN01000000      | ARND00000000     | -9999 |            |              | -9999    |                  |
| JMEN01000000      | AXVF00000000     | 80.8  | 2.862236   | 80.8 - 80.8% | 0.0224   | 91.17            |
| JMEN01000000      | CAPS00000000     | 26.9  | 3.01071    | 26.9 - 26.9% | 0.1606   | 0.03             |
| JMEN01000000      | BAOX01000000     | 28    | 3.00574    | 28 - 28%     | 0.1539   | 0.04             |
| JMEN01000000      | JZIS01000000     | 80.1  | 3.123756   | 80.1 - 80.1% | 0.0233   | 90.65            |
| JMEN01000000      | NZ_CP010797.1    | 27.3  | 3.030267   | 27.3 - 27.3% | 0.1584   | 0.03             |
|                   |                  |       |            |              |          |                  |
| <b>Group E2-8</b> |                  |       |            |              |          |                  |
| Query genome      | Reference genome | DDH   | Model C.I. | Bootstrap    | Distance | Prob. DDH >= 70% |
| CAPS00000000      | JOKB01000000     | 21.6  | 2.830852   | 21.6 - 21.6% | 0.2032   | 0                |
| CAPS00000000      | ARTN00000000     | 20.6  | 2.828702   | 20.6 - 20.6% | 0.2136   | 0                |
| CAPS00000000      | ARND00000000     | -9999 |            |              | -9999    |                  |
| CAPS00000000      | JMEX01000000     | 21.5  | 2.839691   | 21.5 - 21.5% | 0.2038   | 0                |
| CAPS00000000      | JMEW01000000     | 21.5  | 2.840446   | 21.5 - 21.5% | 0.2042   | 0                |
| CAPS00000000      | JMFF01000000     | 21.1  | 2.835341   | 21.1 - 21.1% | 0.2083   | 0                |
| CAPS00000000      | JMFE01000000     | 21.6  | 2.84452    | 21.6 - 21.6% | 0.2032   | 0                |
| CAPS00000000      | JMEV01000000     | 30.7  | 3.018599   | 30.7 - 30.7% | 0.1381   | 0.14             |
| CAPS00000000      | BAOX01000000     | 31.1  | 3.007535   | 31.1 - 31.1% | 0.1361   | 0.17             |
| CAPS00000000      | NZ_CP010797.1    | 29.6  | 3.022032   | 29.6 - 29.7% | 0.1441   | 0.09             |
| CAPS00000000      | JMFC01000000     | 29.7  | 3.015213   | 29.7 - 29.7% | 0.1437   | 0.09             |
| CAPS00000000      | JMFD01000000     | 30.9  | 3.022337   | 30.9 - 30.9% | 0.1375   | 0.15             |
| CAPS00000000      | JMFA01000000     | 30.9  | 3.024549   | 30.9 - 30.9% | 0.1374   | 0.15             |
| CAPS00000000      | JMEZ01000000     | 30.8  | 3.015266   | 30.8 - 30.8% | 0.1379   | 0.15             |
| CAPS00000000      | JMEM01000000     | 30.8  | 3.01487    | 30.8 - 30.8% | 0.1377   | 0.15             |
| CAPS00000000      | JZIS01000000     | 27.1  | 3.015674   | 27.1 - 27.1% | 0.1597   | 0.03             |
| CAPS00000000      | AXVF00000000     | 26.9  | 3.013666   | 26.9 - 26.9% | 0.1605   | 0.03             |
| CAPS00000000      | LFDS01000000     | 26.9  | 3.01572    | 26.9 - 26.9% | 0.1609   | 0.02             |
| CAPS00000000      | JMEY01000000     | 26.8  | 3.005878   | 26.8 - 26.8% | 0.1615   | 0.02             |
| CAPS00000000      | JMEU01000000     | 26.8  | 3.007005   | 26.8 - 26.8% | 0.1616   | 0.02             |
| CAPS00000000      | JMES01000000     | 26.9  | 3.011975   | 26.9 - 26.9% | 0.1606   | 0.03             |
| CAPS00000000      | JMER01000000     | 27.1  | 3.012532   | 27.1 - 27.1% | 0.1593   | 0.03             |



|                  |                  |      |            |             |          |                  |
|------------------|------------------|------|------------|-------------|----------|------------------|
| CAPS00000000     | JMET01000000     | 26.9 | 3.013386   | 26.9 - 26.9 | 0.161    | 0.02             |
| CAPS00000000     | JMEQ01000000     | 26.6 | 3.009438   | 26.6 - 26.6 | 0.1626   | 0.02             |
| CAPS00000000     | JMEP01000000     | 26.9 | 3.012704   | 26.9 - 26.9 | 0.1609   | 0.02             |
| CAPS00000000     | JMEO01000000     | 26.9 | 3.009852   | 26.9 - 26.9 | 0.1606   | 0.03             |
| CAPS00000000     | JMEN01000000     | 26.9 | 3.01071    | 26.9 - 26.9 | 0.1606   | 0.03             |
|                  |                  |      |            |             |          |                  |
| <b>Group F-1</b> |                  |      |            |             |          |                  |
| Query genome     | Reference genome | DDH  | Model C.I. | Bootstrap   | Distance | Prob. DDH >= 70% |
| LPZL00000000     | JMLQ01000000     | 21.3 | 2.34       | 21.3 - 21.3 | 0.2064   | 0                |
| LPZL00000000     | JXQS01000000     | 20.6 | 2.32       | 20.6 - 20.6 | 0.2134   | 0                |
| LPZL00000000     | LPZO00000000     | 43.7 | 2.54       | 43.7 - 43.7 | 0.088    | 6.32             |
|                  |                  |      |            |             |          |                  |
| <b>Group G-3</b> |                  |      |            |             |          |                  |
| Query genome     | Reference genome | DDH  | Model C.I. | Bootstrap   | Distance | Prob. DDH >= 70% |
| AODO00000000     | JMLO01000000     | 21.2 | 2.921555   | 21.2 - 21.2 | 0.2073   | 0                |
| AODO00000000     | CVQP01000000     | 27.7 | 3.020569   | 27.7 - 27.7 | 0.1556   | 0.04             |

Supplementary Table 4. A list of group A specific genes

| Locus tag    | Function             | Protein Sequence                                                                                                                                                                                                                                                                                                                 | Nucleotide sequence                                                                                                                                                                                                                                                                                                                                                                                                                                                                                                                                                                                                                                                                                                                                                                                                                                  |
|--------------|----------------------|----------------------------------------------------------------------------------------------------------------------------------------------------------------------------------------------------------------------------------------------------------------------------------------------------------------------------------|------------------------------------------------------------------------------------------------------------------------------------------------------------------------------------------------------------------------------------------------------------------------------------------------------------------------------------------------------------------------------------------------------------------------------------------------------------------------------------------------------------------------------------------------------------------------------------------------------------------------------------------------------------------------------------------------------------------------------------------------------------------------------------------------------------------------------------------------------|
| ch56_peg917  | hypothetical protein | MRIRHLIAAVPVALLVLTGCS DG<br>GSDSPKDKNDAGETTITAEAG<br>ADAQETAVSVMCAQVVAYLDA<br>TQQQAESTGQPFDRDAKGA EFL<br>DMLKANGGTVVAAYNQAVA<br>AGEPTLDPATATWEDVPAEARE<br>LIEQSVQSGISGSC                                                                                                                                                         | atgcgattcgacatctgatcgcccgctccccgtcgccctgctggtcctcaccggctgcagtgcg<br>gtggcgactcggaccgaaggacaccaagaacgacgcggcgagaccaccatcacggccgagg<br>ccggcgccgacgccaggagaccgggtctcggtgatgtgcgcgaggtggtggcctacctgac<br>gcgacgcagcagcaggccgagagcaccgggcagccgttcgaccgggatgcgaagggcgccgag<br>ttctcgacatgctgaaggcgaacggcggcaccgtggtggcggcgtaaccagcaggcgggtg<br>cggccggtgagccgacgctcgatccggcgaccgacgctgggaggacgtgccggccgaggcccg<br>tgagctcatcgagcagtcggtgacgtccgggatctccggcagctgctga                                                                                                                                                                                                                                                                                                                                                                                       |
| ch56_peg2696 | hypothetical protein | MIDDADITAHLTDEVRALPYPGR<br>WSNPPFAGDGA AVIARDGDLTE<br>LRVDRRAGRVDWVDLQTGAGQ<br>MLAPSLRVLGALAAAYATALRDT<br>RGAGDRALRRIERTFLDSVRTVS<br>ADLAADGTFWATAAEELGDGVL<br>GGDDLPEPLTVVPAGGSTV VIA<br>MPMLRLHRLADEGLT LSYRS<br>AVSYVTLSDDLDTLANTARPGA<br>QASGPARVLVVDGQSPLTADAL<br>AFPALRTLILVEPATLPEHLAAAA<br>AALAVVTVGPREFARIADLLAH<br>HAV | atgatcgacgacgccgacatcacggcgcacctgaccgacgaggtgcgggcgctcccctatccggg<br>gcggtggtcgaatcctcgttcgcggtgacggcgcggggtgatcgcccgacggcgacctga<br>cggagttgcgctcgaccggcgggccggtcgcgtcgactgggtggatctgcagaccggagccggg<br>cagatgctcgaccgctcgtcgcgctcctcgggcgctcgcggcggcgtacgcgacagcattacg<br>ggacaccgaggagccggcgaccgcgctgctgcatcgagcggacgttctcgtattccgtcc<br>gcacgggtgcccgatctggccgacggcaggttctggccaccgggcggaggaaactcggc<br>gacggtgtgctcggcgggtgacgacctcccgaccgctcaccgtggtaccggcgggagggtcgac<br>cgtcgtcatcgatgccgatgctcggctgcaccggcgctcggcagcagggactcacctgtc<br>cgactaccgctccggtgtctacgtgacgtgtccgacgacctcgacaccacactggcgaaca<br>cagcccggcgggtgcacaggcgtcgggaccggccgggtgctcgtcgtcgacgggcagagccc<br>gctcaccgacgacccctgcctttccggcgtcggacgctgatcctcgtcagccccccact<br>gccggagcatctcgccgacggccggcctcgggtggtgacctcggcccccggaaccgt<br>tcggcgatcgccgatctcctcgccaccacgcagctgta |

| Locus tag    | Function             | Protein Sequence                                                                                                                                                                        | Nucleotide sequence                                                                                                                                                                                                                                                                                                                                                                                                                                                                            |
|--------------|----------------------|-----------------------------------------------------------------------------------------------------------------------------------------------------------------------------------------|------------------------------------------------------------------------------------------------------------------------------------------------------------------------------------------------------------------------------------------------------------------------------------------------------------------------------------------------------------------------------------------------------------------------------------------------------------------------------------------------|
| ch56_peg2789 | hypothetical protein | MAGGRKRHVAGAAAAGALAVA<br>GTFGAAPAAATVTGQG DVRTF<br>GNSILVTMLNIDSTTDAPTRCAT<br>VVFDTAGR PVITDLQE IYDGG LG<br>IWWTTMP TETLHLA GQYTGSA<br>DYRV TTECRDDDGVVRLADTVV<br>TLPEGELVGNPPRYSELFPGF | atggccggaggacggaaacggcacgtcgcgggggcccgcggcgggtgactcgcggtggccg<br>ggacattcgggtgcagcgcggccgcggcgacggtgaccgggcagggcgacgtcgcacctcgg<br>caactcgatcctcgtgacgatgctgaacatgactccaccaccgacgcaccgacgcggtgcgca<br>ccgtcgtcttcgacaccgccggccgaccggtgatcaccgatctgcaggagatctacgacggtggac<br>tcggcatctggtggaccacgatcccaccgagacactccatctcgcggggcagtacacgggcagc<br>gccgattaccgctcaccaccgagtgccgggacgacgacggtgtcgtgcgactggccgacaccgt<br>cgtcacctgccgagggcgaaactcgtcgggaaccgccccgggtactcggaaactgttcgggccgtt<br>ctag |
| ch56_peg2885 | hypothetical protein | LDRRFHDRFLHVFGRRLIGHVFS<br>SSPRARPSVCLSNVTRPRGGDG<br>CVLVPRARDCLVSLHVLHVSRYH<br>CRIARCLAGWRRSTAHAPDRSR<br>PERLLIQRASRDRDLY                                                              | ttggaccgacgcttcacgatcggttcctgcacgttttcgggcggcgcttgatcgccacgtatttc<br>ctcgagccccgggcgctccatccgtctgtctgaatgtgacggccgcgccccggcgatgg<br>ttgtgtactgtacctcgggcacgagattgtctgctcctcactccacagtgtccgttatc<br>actgcagaatcgcgcggtgcctggctggatggcggcgatccacggcgatgcgcctgacctca<br>cggccccgagcgcctgctcatccagcgtgcctcacgtgacagggattacctgtactga                                                                                                                                                                |
| ch56_peg4192 | hypothetical protein | MNRQTIEHRGWVVA AAAATAV<br>ASGLLGA AVAGGDDQAESNPAT<br>LTTEEGTDS PEDPSGLEQTNSF<br>GYIPEHETTLETDPIGPEGGIED<br>DPFELGGGRIDPAVVVPADA<br>TLTPAG                                               | atgaatcgacagacgatcgagcaccgcggtgggtggtcgcggcagcggccccacggccgtcg<br>catcgggactgctcggggccgctcgcgggagcgacgaccaggccgagtcgaatcccggcac<br>gctcaccaccgaggaggaaggaccgactcgcggaggaccgagcgggtctcgagcagaccaat<br>tccttcggctacatccccgagcacgagacaccctcgagaccgatcccatcggaccggagggtgg<br>cggcatcaggacgacccgttcgaaactcggcggcgccatcgacccggccgtcgtcgtcccgg<br>tgcccgcagacgcgaccctcaccacccggccggttga                                                                                                               |
